# Supplementary material for: Modulating magnetic exchange, spin dynamics and intermacrocyclic interactions via an oxo-bridge in dihemes through stepwise oxidations
Source: Royal Society of Chemistry journal article supplement (doi:10.1039/d4qi02972k), 2024-12-17
Supplement: d4qi02972k1.pdf [file d4qi02972k1.pdf]

## Modulating Magnetic Exchange, Spin Dynamics and Intermacrocylic Interactions *via* an Oxo-bridge in Dihemes Through Stepwise Oxidations

Sayantani Banerjee,<sup>a</sup> Rupesh Kumar Tiwari,<sup>b</sup> Paulami Chakraborty,<sup>a</sup> Gopalan Rajaraman<sup>\*b</sup> and Sankar Prasad Rath<sup>\*a</sup>

<sup>a</sup>Department of Chemistry, Indian Institute of Technology Kanpur, Kanpur – 208016, India. Email: [sprath@iitk.ac.in](mailto:sprath@iitk.ac.in)

<sup>b</sup>Department of Chemistry, Indian Institute of Technology Bombay, Mumbai – 400076, India. Email: [rajaraman@chem.iitb.ac.in](mailto:rajaraman@chem.iitb.ac.in)

### Experimental Section:

**Materials.** *Cis*-1,2-bis[chloroiron(III) 5-(2,3,7,8,12,13,17,18- octaethylporphyrinyl)] ethene, P1,<sup>[1]</sup> *cis*-1,2-bis[ $\mu$ -oxo iron(III) 5-(2,3,7,8,12,13,17,18-octaethylporphyrinyl)ethene, P2,<sup>[2]</sup> have been prepared by reported procedure. Reagents and solvents are purchased from commercial sources and purified by standard procedures before use.

P3. A 2.5 mg (0.01 mmol) sample of iodine in 0.5 mL of CH<sub>2</sub>Cl<sub>2</sub> and 4.1 mg (0.02 mmol) of AgClO<sub>4</sub> in 0.1 mL of acetonitrile were added to 20 mg (0.016 mmol) of P2 in 2 mL of CH<sub>2</sub>Cl<sub>2</sub>. The mixture was stirred at room temperature for 15 minutes. After filtration of AgI, the product was precipitated by adding n-hexanes. Yield: 15 mg (70%). **Caution!** *Perchlorate salts are potentially explosive when heated or shocked. Handle them in milligram quantities with care.* UV-vis (dichloromethane) [ $\lambda_{\max}$ , nm ( $\epsilon$ , M<sup>-1</sup> cm<sup>-1</sup>): 383 (9.8x 10<sup>4</sup>), 582 (1.1x 10<sup>4</sup>). ESI-MS: *m/z* 1216.5835 (for [P2]<sup>+</sup>). EPR data: in dichloromethane (120 K), *g* = 1.99. IR (KBr):  $\nu$ (ClO<sub>4</sub><sup>-</sup>), cm<sup>-1</sup>: 624, 1108,  $\nu$ (C $\alpha$ -C<sub>meso</sub>), cm<sup>-1</sup>:1554 and  $\nu$ (C $\beta$ -C $\beta$ ), cm<sup>-1</sup>: 1629. <sup>1</sup>H NMR (CDCl<sub>3</sub>, 295 K): *meso*-H: 11.9, 12.3; -CH<sub>3</sub>: 2.0; CH<sub>2</sub>: 9.7, 10.0, 12.1, 14.1, 14.7, 15.7, 20.5, 24.7; CH(b): 26.4 ppm.

P4. A 5 mg (0.04 mmol) sample of iodine in 0.5 mL of CH<sub>2</sub>Cl<sub>2</sub> and 8.2 mg (0.04 mmol) of AgClO<sub>4</sub> in 0.1 mL of acetonitrile were added to 20 mg (0.016 mmol) of P2 in 2 mL of CH<sub>2</sub>Cl<sub>2</sub>. The mixture was stirred at room temperature for 15 minutes. After filtration of AgI, the product

was precipitated by adding n-hexanes. Yield: 15 mg (70%). **Caution!** Perchlorate salts are potentially explosive when heated or shocked. Handle them in milligram quantities with care. UV-vis (dichloromethane) [ $\lambda_{\max}$ , nm ( $\epsilon$ , M<sup>-1</sup> cm<sup>-1</sup>): 376 (8.2x 10<sup>4</sup>), 575 (1.2x 10<sup>4</sup>). ESI-MS:  $m/z$  608.2997 (for [P2]<sup>2+</sup>). <sup>1</sup>H NMR (CDCl<sub>3</sub>, 295 K): *meso*-H: 8.3, 8.7; -CH<sub>3</sub>: 1.9; CH<sub>2</sub>: 7.4, 8.5, 9.5; CH<sub>2</sub>(b): 21.0 ppm.

**Instrumentation.** Mass spectra were recorded using the electrospray ionization technique in a Waters Micromass QuattroMicro triple quadrupole mass spectrometer instrument. The Bruker Vector 22 FT IR spectrophotometer, using KBr pellets, was used to record all infrared spectra. UV-vis spectra were recorded on a PerkinElmer UV/vis spectrometer. Electron paramagnetic resonance (EPR) spectra were obtained on a Bruker EMX EPR spectrometer. Cyclic voltammetric studies were performed on a BAS Epsilon electrochemical workstation in dichloromethane with 0.1 M tetra(n-butyl)ammonium perchlorate (TBAP) as supporting electrolyte and the reference electrode was Ag/AgCl and the auxiliary electrode was a Pt wire. The concentration of the compounds was in the order of 10<sup>-3</sup> M. The ferrocene/ferrocenium couple occurs at  $E_{1/2} = +0.45$  (65) V versus Ag/AgCl under the same experimental conditions. <sup>1</sup>H NMR spectra were recorded on a JEOL 500 MHz instrument. The spectra for paramagnetic molecules were recorded over a 100-kHz bandwidth with 64 K data points and a 5-ms 90° pulse. For a typical spectrum between 2000 and 3000, transients were accumulated with a 50- $\mu$ s delay time. The residual <sup>1</sup>H resonances of the solvents were used as a secondary reference. Variable temperature magnetic susceptibility measurements were carried out in the temperature range of 5-300 K with an applied magnetic field of 0.1 T on polycrystalline samples using a Quantum Design MPMS-XL-5 SQUID magnetometer. The susceptibility data were corrected for the sample holder previously measured using the same conditions and for the diamagnetic contribution of the sample as deduced by using Pascal's constant tables.<sup>[3]</sup>

### **X-ray Structure Solution and Refinement.**

Crystals were coated with light hydrocarbon oil and mounted in the 100K dinitrogen stream of Bruker SMART APEX CCD diffractometer equipped with CRYO Industries low-temperature apparatus and intensity data were collected using graphite-monochromated Mo K $\alpha$  radiation ( $\lambda = 0.71073$  Å). The data integration and reduction were processed with SAINT software.<sup>[4]</sup> An absorption correction was applied.<sup>[5]</sup> The structure was solved by the direct method using SHELXS-97 and was refined on F2 by the full-matrix least-squares technique using the

SHELXL-2018 program package<sup>[6]</sup> Non-hydrogen atoms were refined anisotropically. In the refinement, hydrogens were treated as riding atoms using SHELXL default parameters.

Crystallographic data and data collection parameters are listed in Table S1a. CCDC 2377591 contains the supplementary crystallographic data for this paper. These data can be obtained free of charge from the Cambridge Crystallographic Data Center via [www.ccdc.cam.ac.uk/data\\_request/cif](http://www.ccdc.cam.ac.uk/data_request/cif).

**Table S1a.** Crystal data and structure refinement for P3.

|                                         |                                                                                  |
|-----------------------------------------|----------------------------------------------------------------------------------|
| T (K)                                   | 100 (2)                                                                          |
| Radiation ( $\lambda$ , Å)              | Mo K $\alpha$ (0.71073)                                                          |
| Formula                                 | C <sub>74</sub> H <sub>86</sub> Cl Fe <sub>2</sub> N <sub>8</sub> O <sub>5</sub> |
| Crystal size (mm <sup>3</sup> )         | 0.150 x 0.120 x 0.100                                                            |
| Formula weight                          | 1314.65                                                                          |
| Crystal system                          | Monoclinic                                                                       |
| Space group                             | C 2/c                                                                            |
| a (Å)                                   | 22.192(2)                                                                        |
| b (Å)                                   | 19.316(2)                                                                        |
| c (Å)                                   | 20.102(2)                                                                        |
| $\alpha$ (°)                            | 90                                                                               |
| $\beta$ (°)                             | 114.152(4)                                                                       |
| $\gamma$ (°)                            | 90                                                                               |
| V (Å <sup>3</sup> )                     | 7862.7(13)                                                                       |
| Z                                       | 4                                                                                |
| $d_{\text{calcd}}$ , g•cm <sup>-3</sup> | 1.111                                                                            |
| $\mu$ , mm <sup>-1</sup>                | 0.452                                                                            |
| F(000)                                  | 2780                                                                             |
| Reflections collected                   | 46209                                                                            |
| Independent reflections                 | 6912                                                                             |
| Data/restraints/parameters              | 6912 / 33 / 463                                                                  |
| GOF on $F^2$                            | 1.182                                                                            |
| $R_1^{\text{a}}$ [I>2sigma(I)]          | 0.1102                                                                           |
| $wR_2^{\text{b}}$ [I>2sigma(I)]         | 0.2586                                                                           |
| $R_1^{\text{a}}$ (all data)             | 0.1177                                                                           |
| $wR_2^{\text{b}}$ (all data)            | 0.2630                                                                           |

$$\text{a } R_1 = \frac{\sum ||F_o| - |F_c||}{\sum |F_o|} ; \text{b } wR_2 = \sqrt{\frac{\sum [w(F_o^2 - F_c^2)^2]}{\sum [w(F_o^2)]}}$$

**Table S1b.** Selected Bond Lengths (Å) and Bond angles (°) for P3

|           |           |
|-----------|-----------|
| Fe1-O1    | 1.948(2)  |
| Fe1-N1    | 1.988(5)  |
| Fe1-N2    | 2.017(5)  |
| Fe1-N3    | 2.007(5)  |
| Fe1-N4    | 2.019(6)  |
| C37-C38   | 1.382(17) |
| Fe-O1-Fe  | 143.0(3)  |
| O1-Fe1-N1 | 98.9(3)   |
| O1-Fe1-N2 | 95.9(2)   |
| O1-Fe1-N3 | 100.9(2)  |
| O1-Fe1-N4 | 105.5(2)  |

### Computational Details:

All the single-point calculations and geometry optimizations were performed in the Gaussian 16 suite of programs.<sup>[7]</sup> The hybrid B3LYP functional along with third-order dispersion correction (D3) was used throughout the calculations.<sup>[8]</sup> A def2TZVP (def2- triple- $\zeta$ -valence-polarized) basis set for the Fe atom and a def2SVP (def2-single-  $\zeta$ -valence-polarised) basis set for the rest of the atoms were used.<sup>[9]</sup> Visualization of the molecular orbitals and the corresponding diagrams were made using the Chemcraft software. We have performed broken symmetry DFT calculations in the Gaussian 16 suite of programs to compute the magnetic exchange coupling constants.<sup>[10,11]</sup> Time-dependent density functional theory (TD-DFT) calculations were performed to compute the UV-visible spectra to investigate the several transitions associated with the molecules. To compute the UV-visible spectra, a set of CAM-B3LYP/LANL2DZ/6-31G\*\* (functional/basis set for Fe metal/basis set for rest of the atoms) tool was used which has been reported to yield the spectrum/transitions with best accuracy.<sup>[12]</sup> NMR calculations were performed using the gauge independent atomic orbitals (GIAO) method<sup>[13]</sup> implemented in Orca software<sup>[14]</sup> where the hybrid B3LYP functional was employed throughout the calculations along with basis sets, IGLO II for H, DKH-def2TZVP for Fe and DKH-def2SVP for rest of the atoms.<sup>[15,16]</sup> DKH Hamiltonian was employed to account for the

relativistic effects.<sup>[17]</sup> The third-order dispersion correction with Becke-Johnson damping (D3BJ) was used to capture the non-covalent interactions.<sup>[18]</sup> We have also performed the CASSCF/NEVPT2 calculations to compute the magnetic anisotropy and ZFS (D and E). To perform CASSCF/NEVPT2 calculations, a basis set of DKH-def2TZVP for Fe, O, N and DKH-def2SVP was used for the rest of the atoms. We incorporated 1 sextet, 24 quartet and 75 doublet roots for the Fe metal centre to compute the ZFS parameters (D and E/D). To compute the hyperfine coupling constant, the basis set of EPR II for H, DKH-def2TZVP for Fe and DKH-def2SVP for the rest of the atoms were used.

### References:

- [1] T. E. Clement, D. J. Nurco, K. M. Smith, *Inorg. Chem.*, 1998, **37**, 1150.
- [2] S. K. Ghosh, R. Patra, S. P. Rath, *Inorg. Chim. Acta.*, 2010, **363**, 2791.
- [3] G. A. Bain, J. F. Berry, *J. Chem. Educ.*, 2008, **85**, 532.
- [4] *SAINT+*, 6.02 ed., Bruker AXS, Madison, WI, 1999.
- [5] G. M. Sheldrick, SADABS, Bruker AXS Inc., Madison, WI, 2000.
- [6] G. M. Sheldrick, *SHELXL-2018: Program for Crystal Structure Refinement*; University of Göttingen: Göttingen, Germany, 2018.
- [7] M. Frisch, G. Trucks, H. Schlegel, G. Scuseria, M. Robb, J. Cheeseman, G. Scalmani, V. Barone, G. Petersson, H. Nakatsuji, *Gaussian 16, Revision C. 01*. Gaussian, Inc., Wallingford CT, 2016.
- [8] J. Tirado-Rives, W. L. Jorgensen, *J. Chem. Theory Comput.*, **2008**, *4*, 297.
- [9] F. Weigend, R. Ahlrichs, *Phys. Chem. Chem. Phys.* 2005, **7**, 3297.
- [10] M. Barfield, P. Fagerness, *J. Am. Chem. Soc.* 1997, **119**, 8699.
- [11] F. Neese, Software update: the ORCA program system, version 4.0. *Wiley Interdisciplinary Reviews: Computational Molecular Science*, 2018, **8**, e1327.
- [12] W. Kutzelnigg, U. Fleischer, M. Schindler, *NMR basic principles and progress* 1990, **23**, 165.
- [13] J. D. Rolfes, F. Neese, D. A. Pantazis, *J. Comput. Chem.*, 2020, **41**, 1842.
- [14] M. Reiher, A. Wolf, *J. Chem. Phys.*, 2004, **121**, 2037.
- [15] S. Grimme, S. Ehrlich, L. Goerigk, *J. Comput. Chem.*, 2011, **32**, 1456.
- [16] J. Olsen, *Int. J. Quantum. Chem.*, 2011, **111**, 3267.
- [17] I. Schapiro, K. Sivalingam, F. Neese, *J. Chem. Theory Comput.*, 2013, **9**, 3567.
- [18] M. E. Casida, D. Chong, *Recent advances in density functional methods*. World Scientific Singapore: 1995.

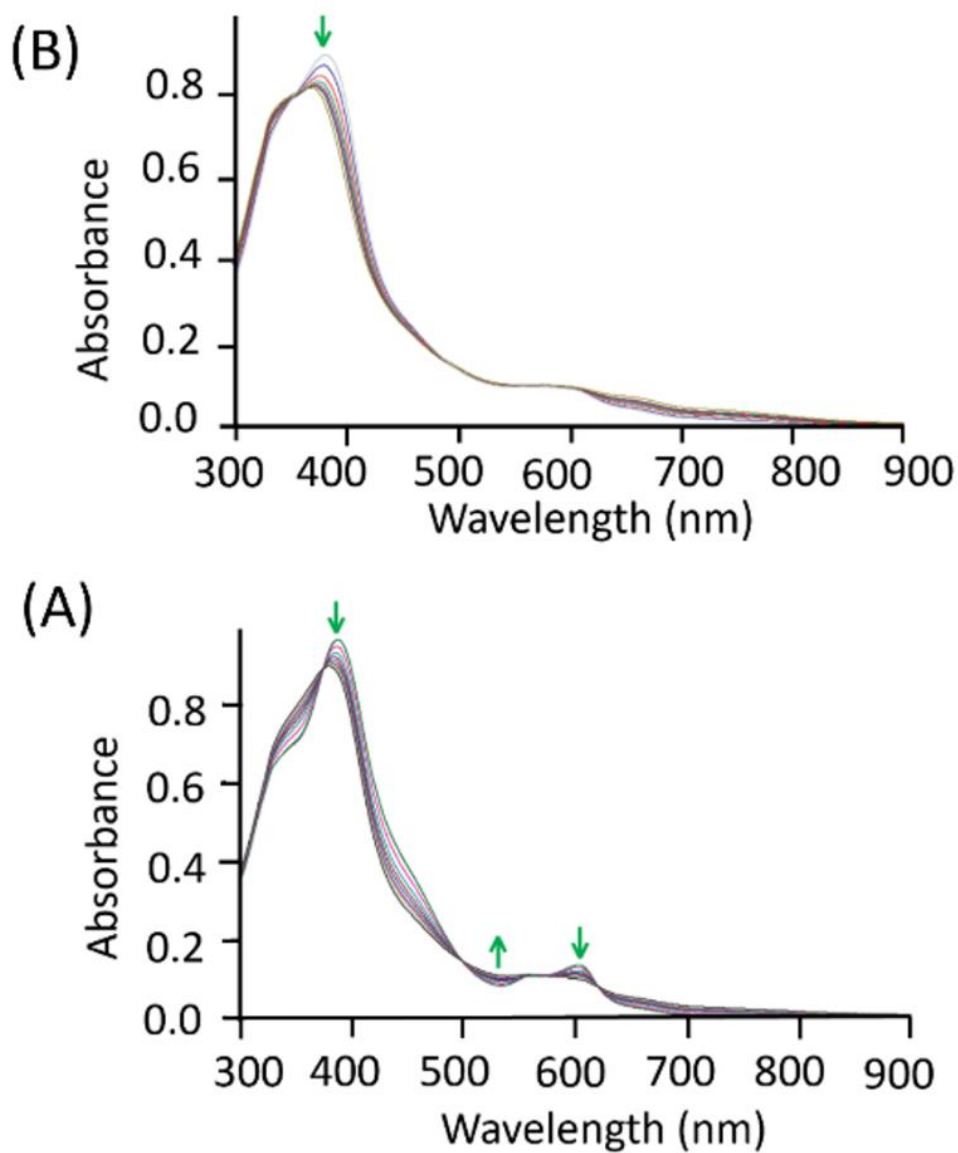

**Figure S1.** UV-visible spectral changes upon coulometric oxidations under nitrogen of P2 (in dichloromethane at 295 K) at constant potentials of (A) 0.70 and (B) 1.04 V. The arrows indicate the increase or decrease of the band intensity.

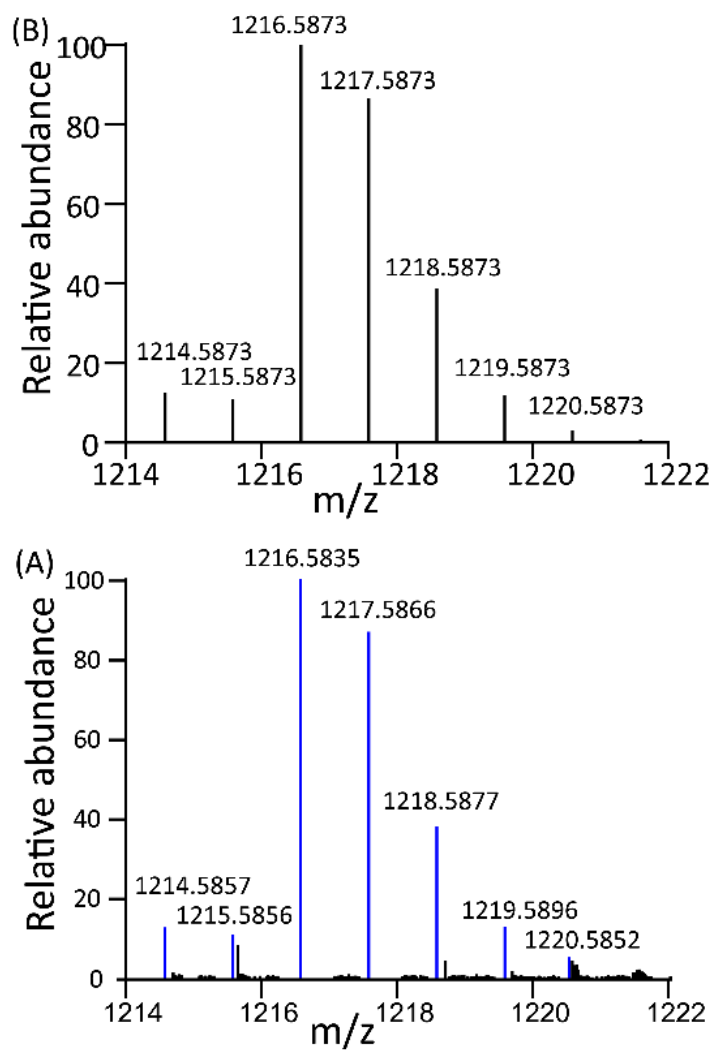

**Figure S2.** Isotopic distribution pattern of (A) experimental and (B) simulated ESI-MS spectrum (positive ion mode) of [P2]<sup>+</sup>



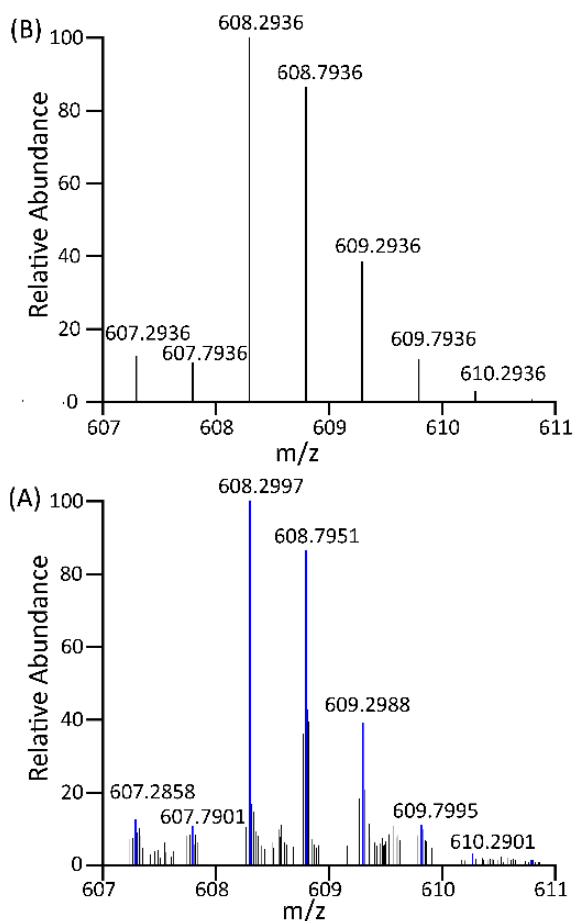

**Figure S3.** Isotopic distribution pattern of (A) experimental and (B) simulated ESI-MS spectrum (positive ion mode) of  $[P2]^{2+}$

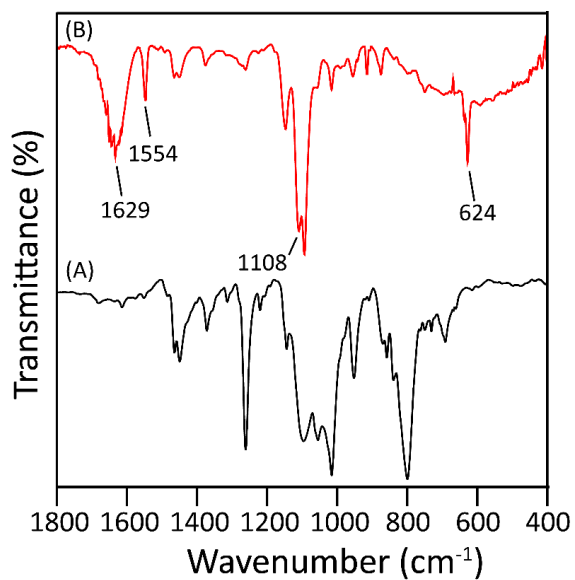

**Figure S4.** IR spectra (selected portions only) of solid polycrystalline samples of (A) P2, and (B) P3.

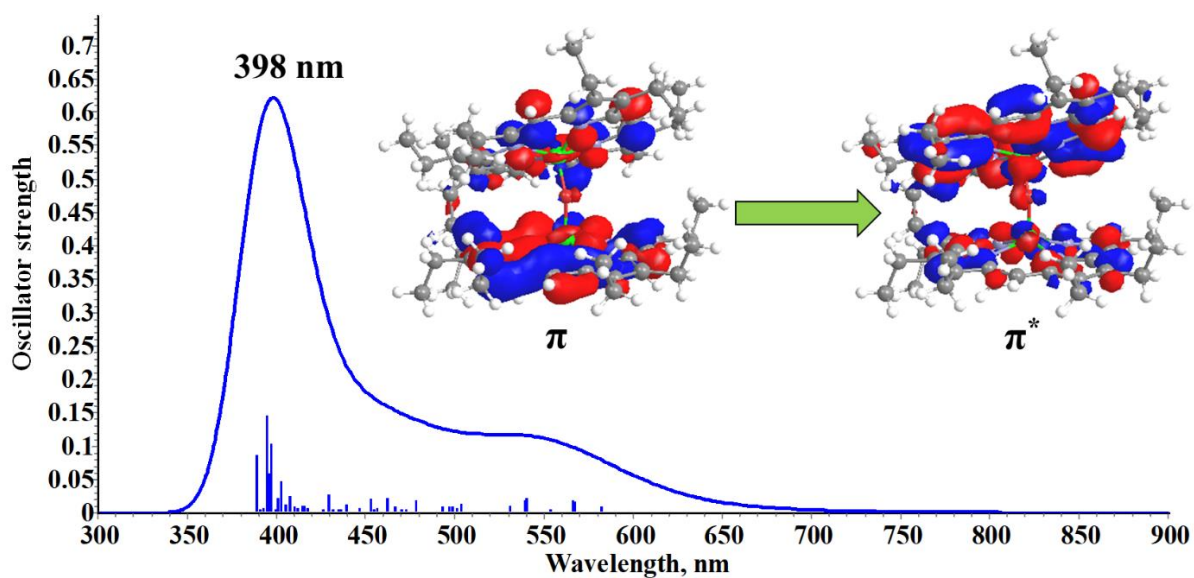

**Figure S5.** TD-DFT plot of P2 with intense Soret band at around 398nm and Q-band at around 500-600 nm.

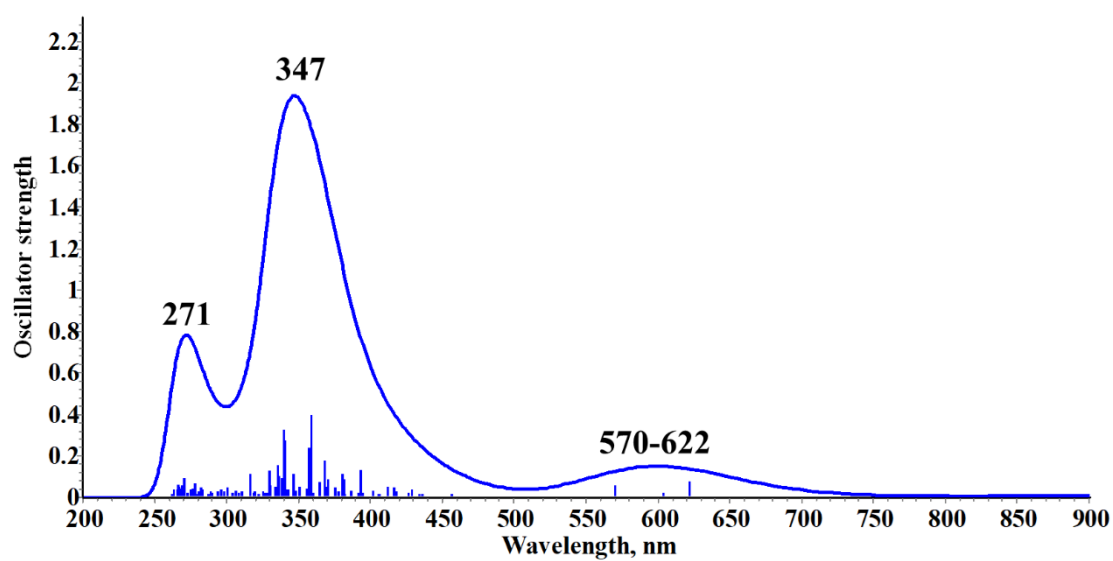

**Figure S6.** TD-DFT plot of P3 with intense Soret band at around 347nm.

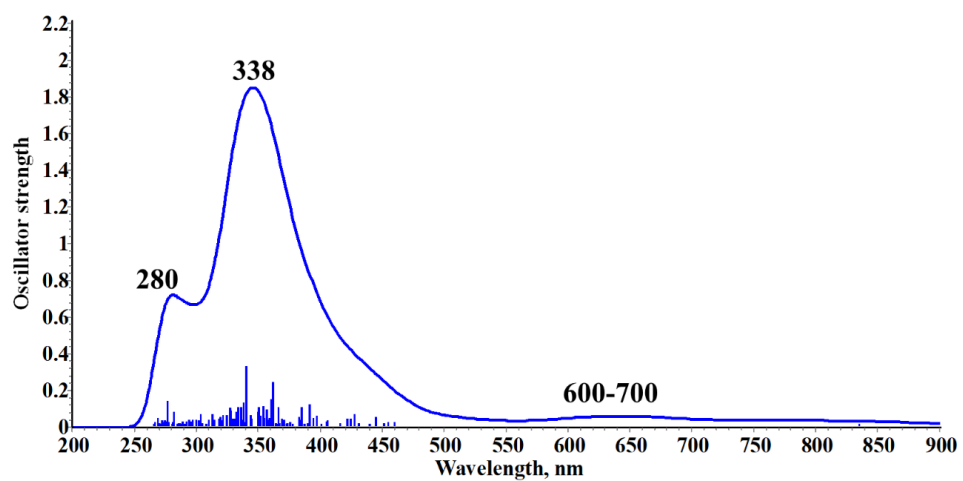

**Figure S7.** TD-DFT plot of P4 with intense Soret band at around 338nm.

(A)

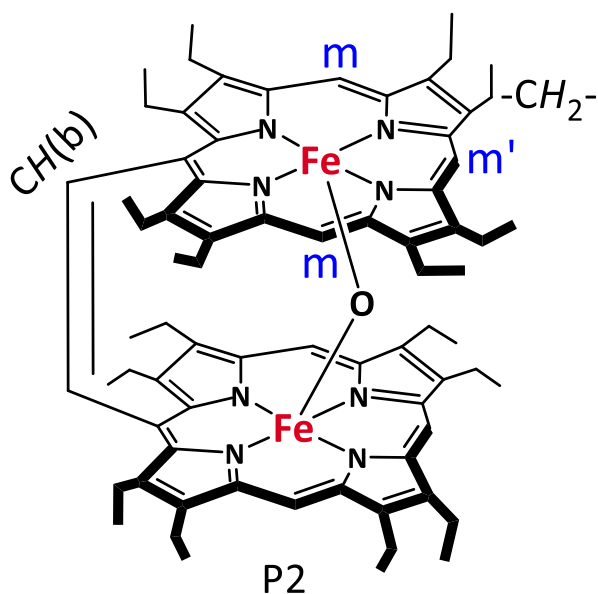

(B)

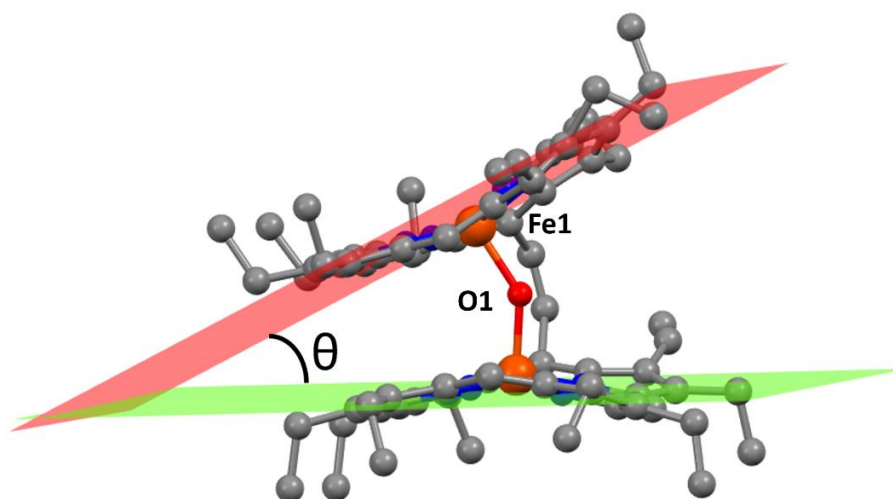

**Figure S8.** (A) Proton numbering scheme used for  $^1\text{H}$  NMR (P2 is shown as representative case). (B) Diagram illustrating the angle  $\theta$  between the two least-squares planes of  $\text{C}_{20}\text{N}_4$  porphyrinato core of P3. (H-atoms have been omitted for clarity).

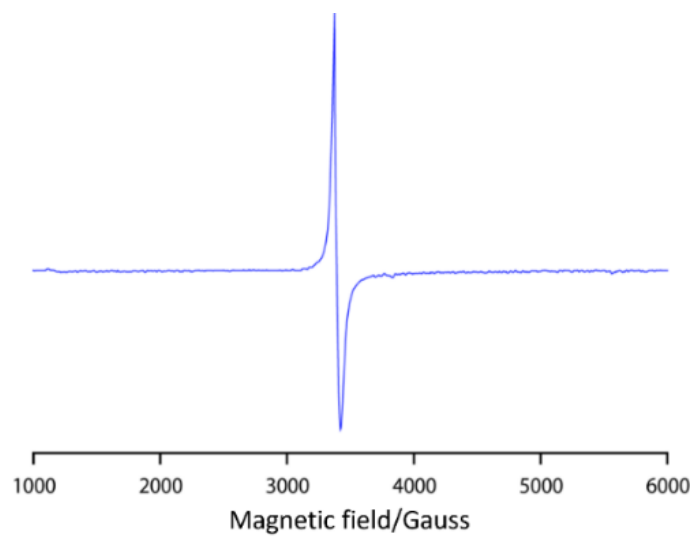

**Figure S9:** EPR spectra (in dichloromethane at 120 K) of P3.

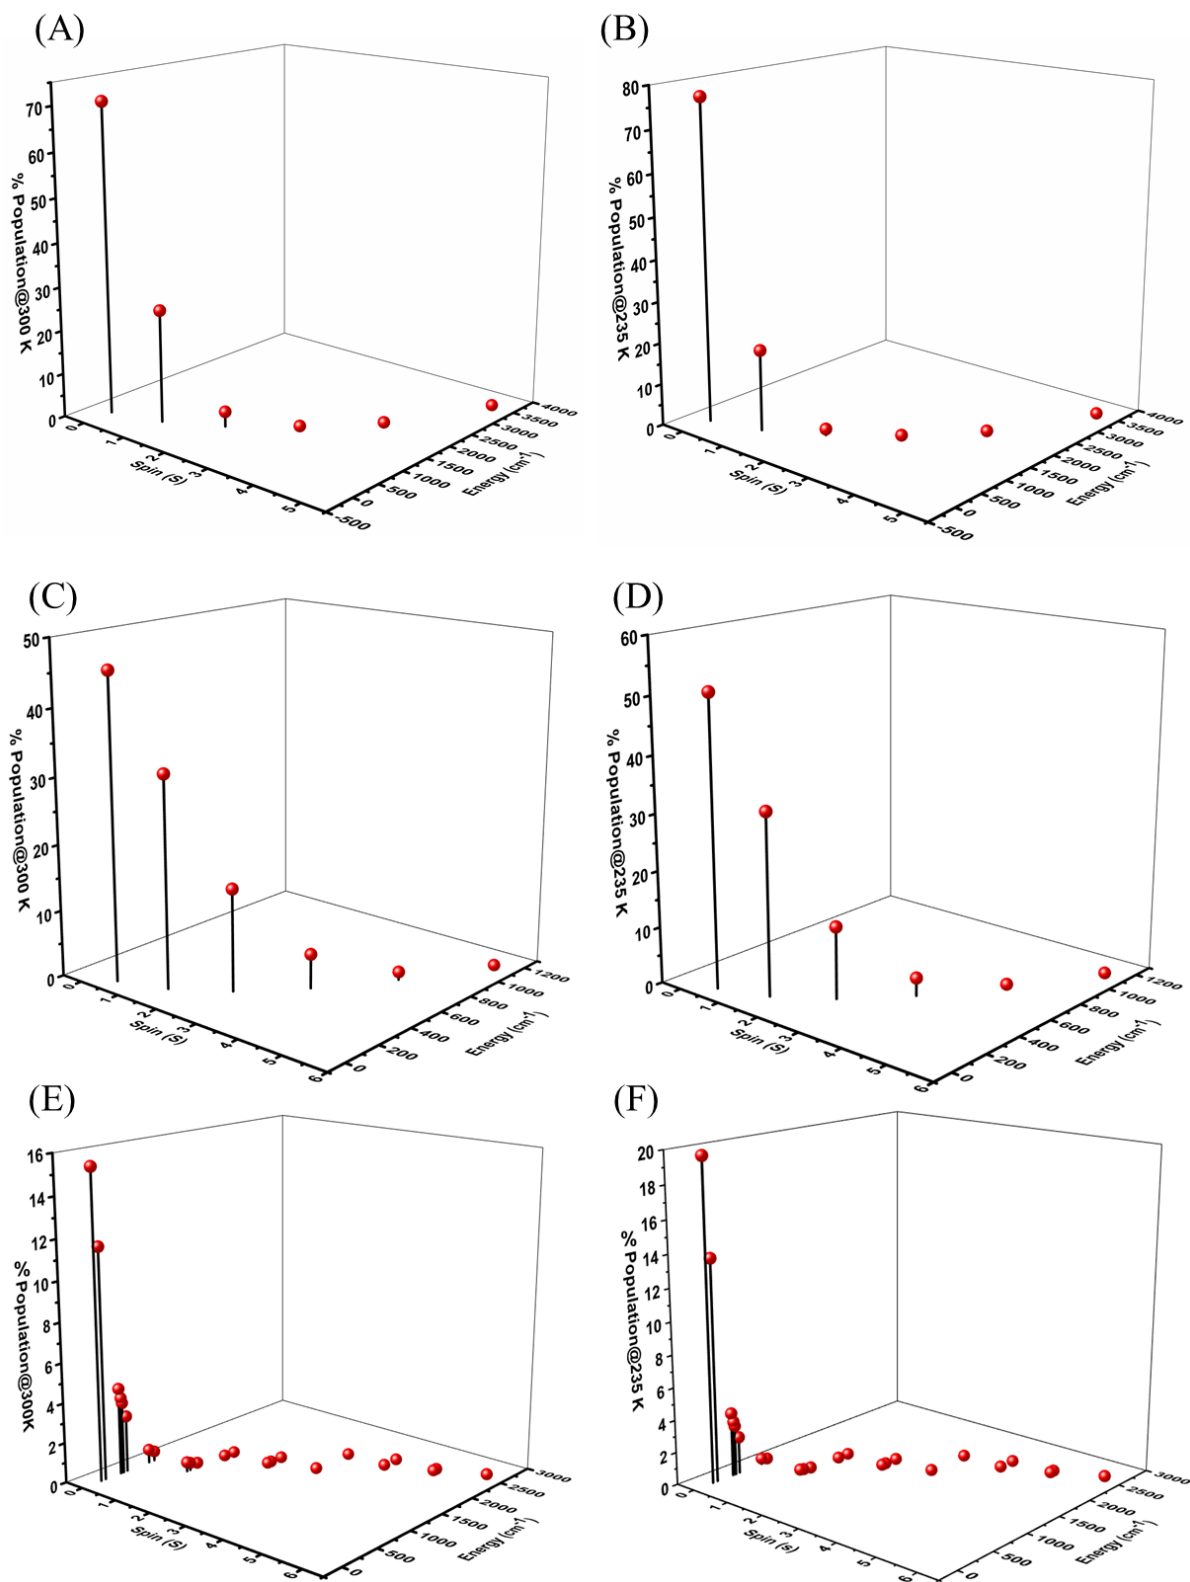

**Figure S10.** Percentage Boltzmann population of P2 at (A) 300 K (B) 235 K for P3 at (C) 300 K and (D) 235 K and P4 at (E) 235 K and (F) 300 K.

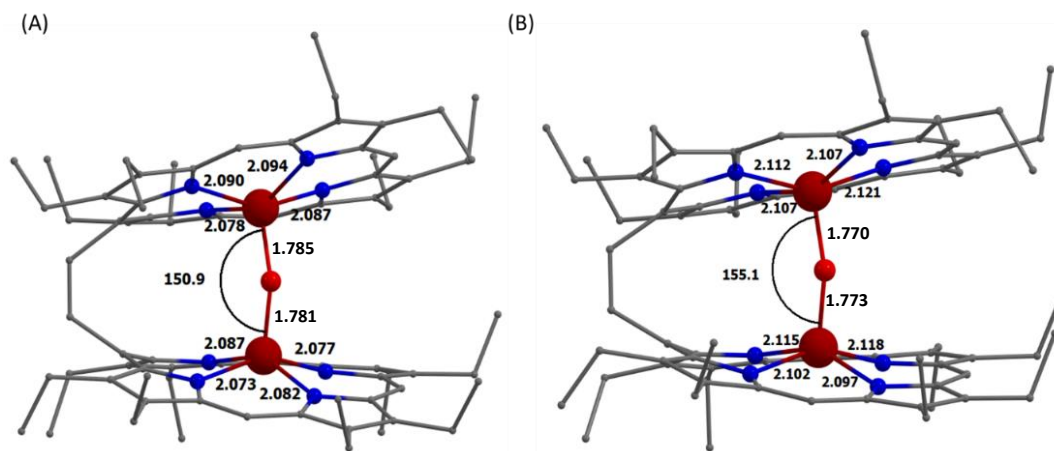

**Figure S11.** (A) X-ray and (B) DFT optimized structure of P2. Selected bond length (in Å) and bond angles (°) are shown. Hydrogen atoms are omitted for clarity. Colour code: Fe, deep red; O, red; N, blue; C, grey.

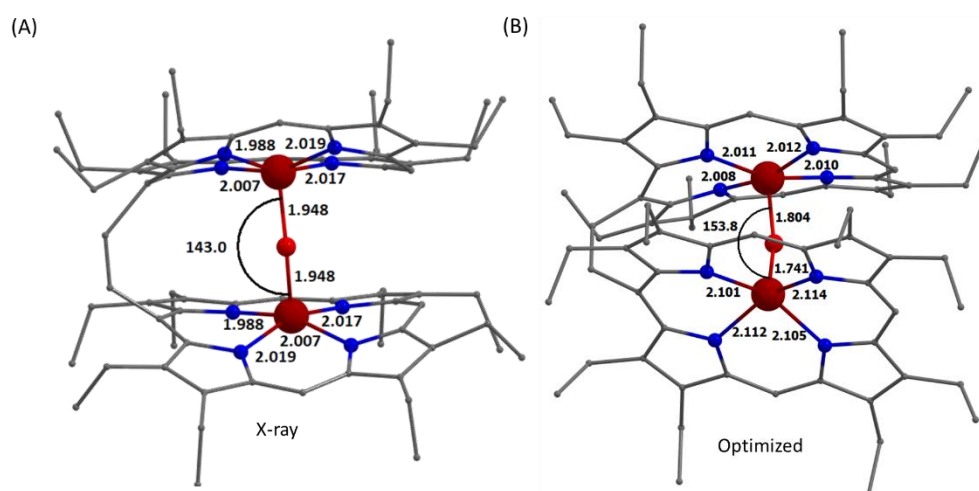

**Figure S12.** (A) X-ray and (B) DFT optimized structure of P3. Selected bond length (in Å) and bond angles (°) are shown. Hydrogen atoms are omitted for clarity.

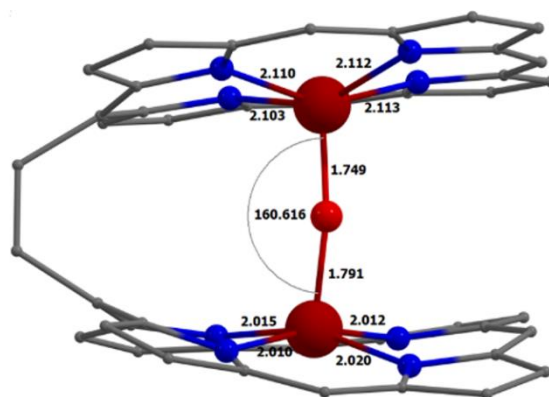

**Figure S13.** DFT optimized structure of P4. Selected bond length (in Å) and bond angles (°) are shown. Hydrogen atoms are omitted for clarity.

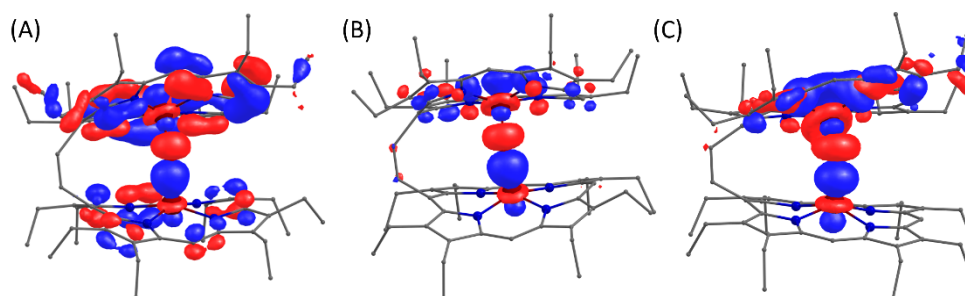

**Figure S14.** (A) A strong  $d_{z^2} - p_z - d_{z^2}$  overlap in P2 (B) A weaker  $d_{z^2} - p_z - d_{z^2}$  overlap in P3 (C) A strong  $d_{z^2} - p_z - d_{z^2}$  overlap in P4.

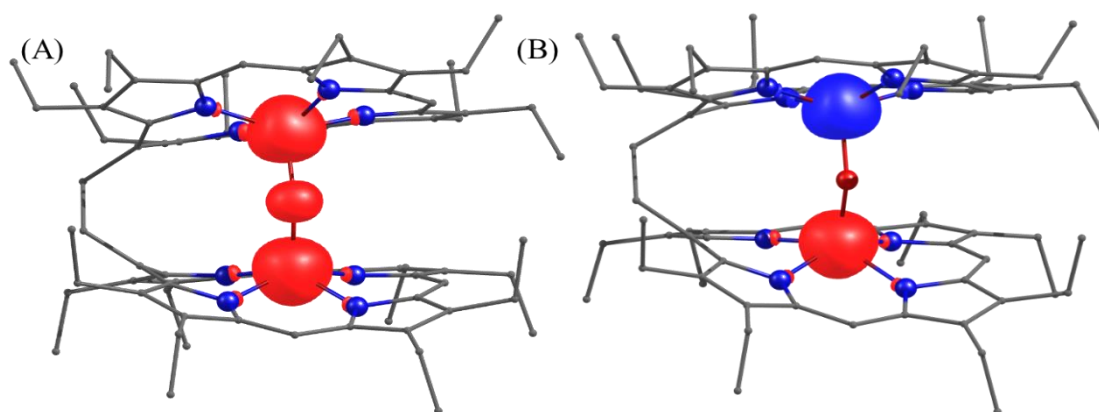

**Figure S15.** Spin density plot of (A) High-spin state and (B) broken symmetry (BS) state of P2.



**Table S2.**  $^1\text{H}$  NMR chemical shift (in ppm) of complex P2

| P2      | CH=CH<br>(exp) | CH=CH<br>(DFT) | CH <sub>2</sub><br>(exp) | CH <sub>2</sub><br>(DFT) | H (m)<br>(exp) | H (m)<br>(DFT) | H<br>(m')<br>(exp) | H (m')<br>(DFT) |
|---------|----------------|----------------|--------------------------|--------------------------|----------------|----------------|--------------------|-----------------|
|         | 15.1           | 9.0            | 4.9                      | 3.6<br>to<br>0.10        | 6.7            | 11.4           | 6.5                | 8.7             |
|         |                | 9.0            | 4.9                      |                          | 6.7            | 11.4           |                    | 7.6             |
|         |                |                | 5.6                      |                          |                | 6.65           |                    |                 |
|         |                |                | 5.9                      |                          |                | 8.80           |                    |                 |
| average | 15.1           | 9.0            |                          | 3.3                      | 6.7            | 9.56           | 6.5                | 8.16            |

**Table S3.**  $^1\text{H}$  NMR chemical shift (in ppm) of complex P3

| P3      | CH=CH<br>(exp) | CH=CH<br>(DFT) | CH <sub>2</sub><br>(exp) | CH <sub>2</sub><br>(DFT) | H (m)<br>(exp) | H (m)<br>(DFT) | H (m')<br>(exp) | H (m')<br>(DFT) |
|---------|----------------|----------------|--------------------------|--------------------------|----------------|----------------|-----------------|-----------------|
|         | 26.4           | 7.13           | 9<br>to<br>25            | 5.6<br>to<br>2.1         | 11.9           | 8.3            | 12.3            | 7.4             |
|         |                | 7.32           |                          |                          | 11.9           | 8.4            |                 | 8.0             |
|         |                |                |                          |                          |                | 7.4            |                 |                 |
|         |                |                |                          |                          |                | 7.2            |                 |                 |
| average |                | 7.22           |                          | 3.85                     |                | 7.82           |                 | 7.7             |

**Table S4.**  $^1\text{H}$  NMR chemical shift (in ppm) of complex P4

| P4      | CH=CH<br>(exp) | CH=CH<br>(DFT) | CH <sub>2</sub><br>(exp) | CH <sub>2</sub><br>(DFT) | H (m)<br>(exp) | H (m)<br>(DFT) | H (m')<br>(exp) | H (m')<br>(DFT) |
|---------|----------------|----------------|--------------------------|--------------------------|----------------|----------------|-----------------|-----------------|
|         | 21             | 8.35           | 7.4                      | 4.1<br>to<br>0.10        | 8.7            | 6.5            | 8.3             | 6.5             |
|         |                | 8.42           | 7.4                      |                          | 8.7            | 6.3            |                 | 7.1             |
|         |                |                | 8.5                      |                          |                | 8.4            |                 |                 |
|         |                |                | 9.5                      |                          |                | 8.3            |                 |                 |
| Average |                | 8.38           |                          | 3.4                      |                | 7.3            |                 | 6.8             |

**Table S5.** DFT computed hyperfine coupling (in MHz) of P3 for the ground state,  $S_T = 1/2$ 

| P3      | CH=CH | CH <sub>2</sub>    | H (m) | H (m') |
|---------|-------|--------------------|-------|--------|
|         | -2.57 | 0.88<br>to<br>0.00 | 1.96  | 1.34   |
|         | -0.79 |                    | 2.48  | 3.18   |
|         |       |                    | 1.99  |        |
|         |       |                    | 2.32  |        |
| average | -1.68 | 0.44               | 2.18  | 2.26   |

**Table S6.** DFT computed hyperfine coupling (in MHz) of P3 for 1<sup>st</sup> excited state,  $S_T = 3/2$ 

| P3      | CH=CH | CH <sub>2</sub>     | H (m) | H (m') |
|---------|-------|---------------------|-------|--------|
|         | -0.30 | 0.17<br>to<br>-0.09 | 0.64  | 0.55   |
|         | -0.55 |                     | 0.61  | 0.66   |
|         |       |                     | 0.63  |        |
|         |       |                     | 0.50  |        |
| average | -0.4  | 0.04                | 0.5   | 0.6    |

**Table S7.** DFT computed hyperfine coupling (in MHz) of P3 for the 2<sup>nd</sup> excited state,  $S_T = 5/2$ 

| P3      | CH=CH | CH <sub>2</sub>     | H (m) | H (m') |
|---------|-------|---------------------|-------|--------|
|         | -1.53 | 0.68<br>to<br>-0.03 | 1.23  | 0.81   |
|         | -0.64 |                     | 1.87  | 2.17   |
|         |       |                     | 1.36  |        |
|         |       |                     | 2.10  |        |
| average | -1.00 | 0.32                | 1.6   | 1.4    |

**Table S8.** DFT computed hyperfine coupling (in MHz) of P4 for 1<sup>st</sup> excited state,  $S_T = 1$ .

| P4      | CH=CH | CH <sub>2</sub>     | H (m) | H (m') |
|---------|-------|---------------------|-------|--------|
|         | 7.3   | 1.88<br>to<br>-0.01 | 1.4   | -3.7   |
|         | -2.3  |                     | 1.6   | 1.5    |
|         |       |                     | -4.2  |        |
|         |       |                     | -2.6  |        |
| average | 2.5   | 0.9                 | -3.8  | -1.1   |

**Table S9.** DFT computed hyperfine coupling (in MHz) of P4 for the 2<sup>nd</sup> excited state,  $S_T = 2$ 

| P4      | CH=CH | CH <sub>2</sub>     | H (m) | H (m') |
|---------|-------|---------------------|-------|--------|
|         | 1.9   | 0.81<br>to<br>-0.05 | 0.6   | -0.9   |
|         | -1.5  |                     | 0.9   | 0.6    |
|         |       |                     | -1.5  |        |
|         |       |                     | -0.2  |        |
| average | 0.2   | 0.37                | -0.1  | -0.15  |

**Table S10.** DFT computed ZFS parameters D and E/D and magnetic anisotropy for Fe1/Fe2 metal centres of P3 and P4

|         | D (cm <sup>-1</sup> ) | E/D   | g <sub>x</sub> | g <sub>y</sub> | g <sub>z</sub> |
|---------|-----------------------|-------|----------------|----------------|----------------|
| P3, Fe1 | 2.986                 | 0.007 | 2.000          | 2.000          | 2.001          |
| P3, Fe2 | 2.790                 | 0.009 | 2.000          | 2.000          | 2.001          |
| P4, Fe1 | 1.088                 | 0.002 | 2.001          | 2.001          | 2.001          |
| P4, Fe2 | 1.093                 | 0.013 | 2.001          | 2.001          | 2.001          |

**Table S11.** Overlap integrals between the d-orbitals of Fe1-Fe2 metal centres in P2.

| Overlap integral | $d_{xy}$ | $d_{xz}$ | $d_{yz}$ | $d_{x^2-y^2}$ | $d_{z^2}$ |
|------------------|----------|----------|----------|---------------|-----------|
| $d_{xy}$         | 0.153    | 0.001    | 0.007    | 0.323         | 0.012     |
| $d_{xz}$         | 0.008    | 0.291    | 0.283    | 0.047         | 0.131     |
| $d_{yz}$         | 0.005    | 0.284    | 0.301    | 0.002         | 0.134     |
| $d_{x^2-y^2}$    | 0.317    | 0.004    | 0.007    | 0.052         | 0.013     |
| $d_{z^2}$        | 0.002    | 0.175    | 0.284    | 0.042         | 0.667     |

**Table S12.** Overlap integrals between the d-orbitals of Fe1-Fe2 metal centres in P3.

| Overlap integral | $d_{xy}$ | $d_{xz}$ | $d_{yz}$ | $d_{x^2-y^2}$ | $d_{z^2}$ |
|------------------|----------|----------|----------|---------------|-----------|
| $d_{xy}$         | 0.522    | 0.003    | 0.028    | 0.009         | 0.014     |
| $d_{xz}$         | 0.001    | 0.488    | 0.160    | 0.013         | 0.422     |
| $d_{yz}$         | 0.001    | 0.180    | 0.481    | 0.004         | 0.008     |
| $d_{x^2-y^2}$    | 0.003    | 0.005    | 0.003    | 0.023         | 0.002     |
| $d_{z^2}$        | 0.001    | 0.213    | 0.006    | 0.001         | 0.015     |

**Table S13.** Overlap integrals between the d-orbitals of Fe1-Fe2 metal centres in P4.

| Overlap integral | $d_{xy}$ | $d_{xz}$ | $d_{yz}$ | $d_{x^2-y^2}$ | $d_{z^2}$ |
|------------------|----------|----------|----------|---------------|-----------|
| $d_{xy}$         | 0.002    | 0.021    | 0.004    | 0.054         | 0.025     |
| $d_{xz}$         | 0.095    | 0.196    | 0.131    | 0.110         | 0.019     |
| $d_{yz}$         | 0.002    | 0.148    | 0.731    | 0.003         | 0.005     |
| $d_{x^2-y^2}$    | 0.002    | 0.002    | 0.009    | 0.213         | 0.006     |
| $d_{z^2}$        | 0.015    | 0.107    | 0.003    | 0.007         | 0.647     |

To compute the magnetic exchanges,  $J_O$  and  $J_{CH=CH}$ , we have used two models (see Figures S16A and B). In the computation of  $J_{CH=CH}$ ,  $O^{2-}$ -bridging atom was used as point charge (net Mulliken charge on oxygen bridged atom,  $\Delta\delta_O = -0.67$ ) while in the case of  $J_O$  computation,  $-CH=CH-$  atoms were used as point charges ( $\Delta\delta_C = 0.22$ ,  $\Delta\delta_H = -0.07$ ).

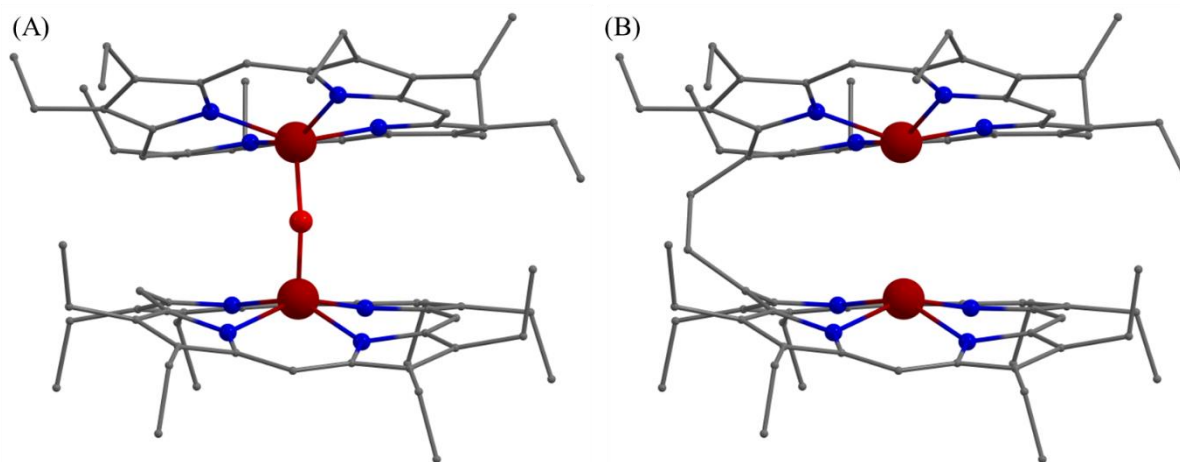

**Figure S16.** (A) the model used to compute  $J_O$  where the  $CH=CH$  group was used as the point charge (B) model used to compute the  $J_{CH=CH}$  where the  $O^{2-}$  bridging ion was used as the point charge.

The cooperative enhancement by porphyrins in antiferromagnetic coupling ( $J_{coop}$ ) could be defined as

$$J_{coop} = J_{Fe-Fe} - (J_O + J_{CH=CH}).$$

The coordinates of X-ray structures (P2 and P3)/optimised (P4) along with corresponding excited state energies and oscillator strength.

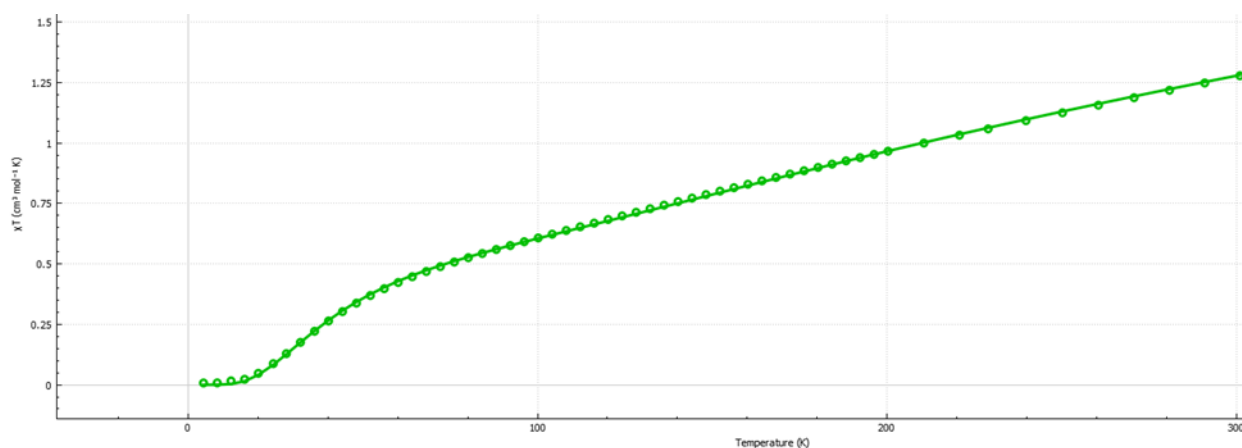

**Figure S17(A).**  $\chi T$  vs T fitting for complex **P4** using PHI without taking DFT computed J's as initial parameters in the PHI input which gives a good fit but unreliable J's (see Table S14).

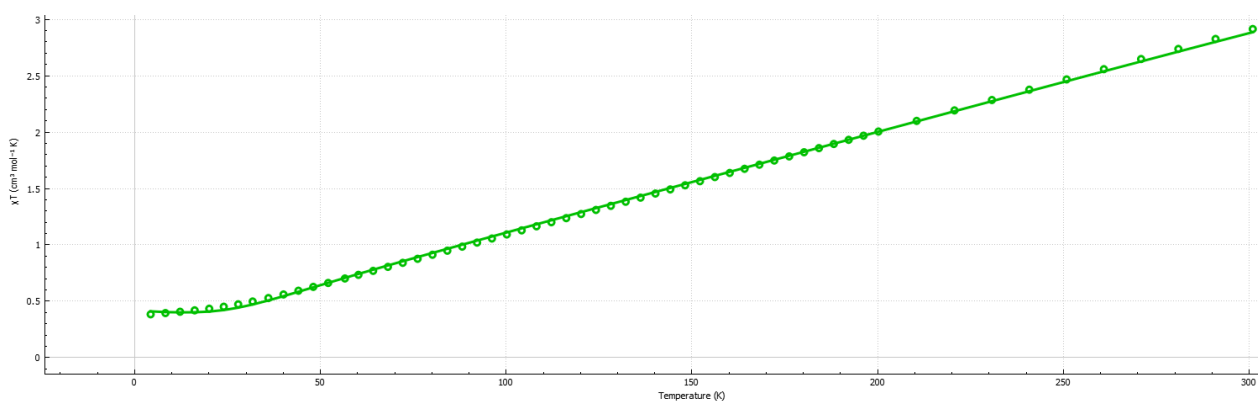

**Figure S17 (B).**  $\chi T$  vs T fitting for complex **P3** using PHI without taking DFT computed J's as initial parameters in the PHI input.

**Table S14.** The J's obtained from DFT calculations, from PHI fit with and without taking initial parameters from the DFT computed J's.

| Exchange type      | Spin centres                                                  | P4                                |                                                                            |                                                                               |
|--------------------|---------------------------------------------------------------|-----------------------------------|----------------------------------------------------------------------------|-------------------------------------------------------------------------------|
|                    |                                                               | $J_{\text{DFT}} (\text{cm}^{-1})$ | $J_{\text{sim}} (\text{cm}^{-1})$ with guidance from DFT computed J values | $J_{\text{sim}} (\text{cm}^{-1})$ without guidance from DFT computed J values |
| $J_{\text{Fe-Fe}}$ | <b><i>Fe1 – Fe2</i></b>                                       | -106.1                            | -116.1                                                                     | <b>-179.2</b>                                                                 |
| $J_{\text{Fe-r}}$  | <b><i>Fe1 – Fe1<sub>rad</sub>/Fe1 – Fe1<sub>rad</sub></i></b> | -26.5                             | -27.2                                                                      | <b>24.6</b>                                                                   |
| $J_{\text{Fe-r}}$  | <b><i>Fe1 – Fe2<sub>rad</sub>/Fe2 – Fe1<sub>rad</sub></i></b> | -                                 | -                                                                          | <b>75.4</b>                                                                   |
| $J_{\text{r-r}}$   | <b><i>Fe1<sub>rad</sub> – Fe2<sub>rad</sub></i></b>           | -3.1                              | -2.4                                                                       | <b>-3.4</b>                                                                   |



**Table S15.** The xyz coordinate of the X-ray/optimised structures along with corresponding TD-DFT excited state energies with oscillator strength.

| P2 | X-ray<br>xyz coordinates |          |          | Excites state<br>energies | Oscillator<br>strength |
|----|--------------------------|----------|----------|---------------------------|------------------------|
|    |                          |          |          |                           |                        |
| Fe | -0.35668                 | -0.27552 | -1.64695 | 806.21                    | 0                      |
| Fe | 0.133528                 | -0.05477 | 1.763518 | 792.42                    | 0.0001                 |
| O  | -0.17556                 | -0.60612 | 0.098134 | 788.44                    | 0                      |
| N  | 0.309318                 | 1.677054 | -1.89856 | 777.48                    | 0.0001                 |
| N  | -2.29512                 | 0.469153 | -1.85744 | 775.47                    | 0.0002                 |
| N  | -1.1127                  | -2.017   | -2.53121 | 764.28                    | 0.0001                 |
| N  | 1.512595                 | -0.83241 | -2.39658 | 744.93                    | 0.0001                 |
| N  | 0.825676                 | 1.908984 | 1.615816 | 737.28                    | 0                      |
| N  | -1.68938                 | 0.758964 | 2.335999 | 681.4                     | 0.001                  |
| N  | -0.38005                 | -1.67766 | 2.961901 | 671.14                    | 0.0013                 |
| N  | 2.117937                 | -0.54062 | 2.115519 | 659.29                    | 0.0003                 |
| C  | 1.619879                 | 2.101175 | -1.97514 | 651.62                    | 0.0004                 |
| C  | 1.664073                 | 3.552987 | -2.00916 | 637.15                    | 0                      |
| C  | 0.397322                 | 3.99076  | -1.87256 | 628.66                    | 0                      |
| C  | -0.44438                 | 2.817933 | -1.76395 | 628.34                    | 0                      |
| C  | -1.80847                 | 2.835543 | -1.53502 | 622.44                    | 0.0007                 |
| C  | -2.69172                 | 1.766523 | -1.6041  | 619.46                    | 0.0015                 |
| C  | -4.13805                 | 1.842245 | -1.53612 | 619.06                    | 0.0006                 |
| C  | -4.61719                 | 0.601177 | -1.79061 | 598.76                    | 0.0006                 |
| C  | -3.46974                 | -0.25967 | -1.96964 | 597.9                     | 0.0036                 |
| C  | -3.50982                 | -1.6127  | -2.26811 | 582.91                    | 0.0002                 |
| H  | -4.36702                 | -2.02235 | -2.28115 | 582.45                    | 0.0086                 |
| C  | -2.42673                 | -2.42851 | -2.54896 | 567.71                    | 0.0168                 |
| C  | -2.50733                 | -3.81649 | -2.95021 | 566.5                     | 0.0184                 |
| C  | -1.23914                 | -4.24533 | -3.18134 | 553.91                    | 0.0052                 |
| C  | -0.37223                 | -3.11139 | -2.91767 | 552.96                    | 0.0009                 |
| C  | 1.009608                 | -3.14537 | -2.99083 | 546.17                    | 0.0008                 |
| H  | 1.3985                   | -3.9729  | -3.24977 | 543.98                    | 0.001                  |
| C  | 1.885352                 | -2.11173 | -2.73077 | 539.92                    | 0.0214                 |

|   |          |          |          |        |        |
|---|----------|----------|----------|--------|--------|
| C | 3.319473 | -2.217   | -2.80921 | 539.35 | 0.0189 |
| C | 3.820199 | -0.99323 | -2.49104 | 530.68 | 0.0105 |
| C | 2.676901 | -0.12187 | -2.24094 | 527.28 | 0.0032 |
| C | 2.715892 | 1.24749  | -1.96723 | 523.34 | 0.001  |
| C | 2.852702 | 4.41397  | -2.33324 | 519.65 | 0.0004 |
| H | 3.65204  | 4.051333 | -1.87576 | 503.49 | 0.0135 |
| H | 2.695092 | 5.329524 | -1.98916 | 501.22 | 0.0059 |
| C | 3.119964 | 4.484823 | -3.82563 | 498.9  | 0.0089 |
| H | 3.911609 | 5.039002 | -3.98925 | 496.94 | 0.0081 |
| H | 2.344833 | 4.879142 | -4.27706 | 493.12 | 0.0076 |
| H | 3.275064 | 3.579371 | -4.17368 | 485.43 | 0.0016 |
| C | -0.09022 | 5.41185  | -1.93047 | 478.77 | 0.0001 |
| H | -0.81072 | 5.531131 | -1.26286 | 478.43 | 0.0174 |
| H | 0.653145 | 6.016905 | -1.68319 | 477.41 | 0.0027 |
| C | -0.61073 | 5.805374 | -3.27756 | 475.56 | 0.0004 |
| H | -0.92599 | 6.732802 | -3.24886 | 472.59 | 0.0022 |
| H | -1.35403 | 5.214765 | -3.52542 | 472.41 | 0.0054 |
| H | 0.104503 | 5.723157 | -3.94131 | 470.84 | 0.0011 |
| C | -4.92531 | 3.106984 | -1.3269  | 470.52 | 0.0011 |
| H | -4.48038 | 3.654967 | -0.63035 | 469.91 | 0.0053 |
| H | -5.83019 | 2.874112 | -0.99725 | 466.46 | 0.0075 |
| C | -5.05881 | 3.931347 | -2.59511 | 461.87 | 0.0222 |
| H | -5.56097 | 4.751325 | -2.3993  | 460.86 | 0.0001 |
| H | -5.53137 | 3.411002 | -3.27408 | 460.77 | 0.0004 |
| H | -4.16722 | 4.167747 | -2.92441 | 457.22 | 0.0023 |
| C | -6.05212 | 0.17211  | -1.95613 | 456.37 | 0.0063 |
| H | -6.6278  | 0.75384  | -1.39708 | 454.35 | 0.0046 |
| H | -6.15014 | -0.75555 | -1.62231 | 452.59 | 0.0197 |
| C | -6.53633 | 0.232294 | -3.39001 | 446.36 | 0.0065 |
| H | -7.47647 | -0.03785 | -3.42703 | 444.83 | 0.0024 |
| H | -5.99955 | -0.37443 | -3.94101 | 443.06 | 0.0024 |
| H | -6.44608 | 1.148169 | -3.72741 | 441.31 | 0.0036 |
| C | -3.75364 | -4.6497  | -3.01289 | 438.85 | 0.0114 |

|   |          |          |          |        |        |
|---|----------|----------|----------|--------|--------|
| H | -3.65926 | -5.31806 | -3.73712 | 437.89 | 0.0014 |
| H | -4.52182 | -4.06629 | -3.2386  | 436.36 | 0.0051 |
| C | -4.04612 | -5.36924 | -1.71318 | 435.84 | 0.0014 |
| H | -4.85527 | -5.91346 | -1.81486 | 434.98 | 0.0045 |
| H | -4.18088 | -4.7119  | -1.0009  | 432.72 | 0.0002 |
| H | -3.28903 | -5.94933 | -1.48295 | 431.72 | 0.0055 |
| C | -0.7669  | -5.57332 | -3.68543 | 429.88 | 0.0038 |
| H | -1.45134 | -6.25988 | -3.48111 | 429.53 | 0.0003 |
| H | 0.065075 | -5.826   | -3.2119  | 428.93 | 0.0262 |
| C | -0.50472 | -5.56033 | -5.17441 | 427.25 | 0.0007 |
| H | -0.20277 | -6.44665 | -5.4607  | 426.8  | 0.0014 |
| H | 0.188756 | -4.89715 | -5.37839 | 426.07 | 0.0047 |
| H | -1.3281  | -5.32404 | -5.65028 | 424.73 | 0.0015 |
| C | 4.059387 | -3.48476 | -3.12253 | 423.66 | 0.004  |
| H | 4.964855 | -3.25727 | -3.45358 | 423    | 0.0011 |
| H | 3.586152 | -3.9642  | -3.84487 | 421.31 | 0      |
| C | 4.186685 | -4.39475 | -1.92529 | 417.52 | 0.0062 |
| H | 4.674215 | -5.20485 | -2.18183 | 415.58 | 0.0103 |
| H | 3.293169 | -4.6393  | -1.60527 | 414.93 | 0.0005 |
| H | 4.674217 | -3.93096 | -1.21388 | 414.28 | 0.0091 |
| C | 5.293882 | -0.63386 | -2.47883 | 412.37 | 0.0011 |
| H | 5.486898 | -0.0343  | -1.71306 | 412.11 | 0.0067 |
| H | 5.840209 | -1.45281 | -2.37781 | 410.56 | 0.0021 |
| C | 5.621769 | 0.024682 | -3.7078  | 409.83 | 0.0085 |
| H | 6.549134 | 0.336202 | -3.67475 | 407.5  | 0.0243 |
| H | 5.024102 | 0.79044  | -3.83875 | 404.84 | 0.011  |
| H | 5.514717 | -0.60435 | -4.45296 | 402.8  | 0.0464 |
| C | 3.977449 | 1.829787 | -1.28132 | 400.63 | 0.0214 |
| H | 4.666321 | 2.155809 | -1.84981 | 399.55 | 0.0047 |
| C | 4.180193 | 1.91168  | 0.021837 | 398.31 | 0.0008 |
| H | 4.997881 | 2.293823 | 0.319525 | 397.23 | 0.0746 |
| C | 2.114793 | 2.300036 | 1.326368 | 396.79 | 0.1026 |
| C | 2.193869 | 3.753694 | 1.296666 | 395.45 | 0.0581 |

|   |          |          |          |        |        |
|---|----------|----------|----------|--------|--------|
| C | 0.938299 | 4.214764 | 1.489096 | 394.66 | 0.146  |
| C | 0.082239 | 3.064612 | 1.651976 | 393.37 | 0.0023 |
| C | -1.29314 | 3.11295  | 1.821338 | 392.9  | 0.0066 |
| C | -2.1234  | 2.050834 | 2.143206 | 390.71 | 0.0056 |
| C | -3.54128 | 2.14355  | 2.410366 | 389.17 | 0.0858 |
| C | -3.97459 | 0.892934 | 2.725316 | 387.03 | 0.0023 |
| C | -2.81764 | 0.038193 | 2.698745 | 384.46 | 0.02   |
| C | -2.79044 | -1.28923 | 3.110721 | 383.4  | 0.0036 |
| H | -3.62877 | -1.69909 | 3.287261 | 378.6  | 0.0125 |
| C | -1.6675  | -2.07046 | 3.289417 | 378.03 | 0.0049 |
| C | -1.64392 | -3.39094 | 3.907279 | 376.24 | 0.0764 |
| C | -0.33883 | -3.77724 | 3.950002 | 374.79 | 0.329  |
| C | 0.434773 | -2.70882 | 3.368798 | 373.08 | 0.2293 |
| C | 1.807669 | -2.71152 | 3.216962 | 370.2  | 0.0339 |
| H | 2.270067 | -3.4655  | 3.561207 | 369.47 | 0.0574 |
| C | 2.58157  | -1.73614 | 2.619352 | 365.57 | 0.0183 |
| C | 4.014445 | -1.84151 | 2.423902 | 359.33 | 0.2037 |
| C | 4.391756 | -0.71794 | 1.741777 | 357.38 | 0.15   |
| C | 3.209416 | 0.107644 | 1.583044 | 356.53 | 0.1065 |
| C | 3.166961 | 1.42364  | 1.106539 | 354.93 | 0.1451 |
| C | 3.458016 | 4.568182 | 1.217441 | 352.73 | 0.0474 |
| H | 3.22882  | 5.498913 | 0.969842 | 350.2  | 0.073  |
| H | 4.038944 | 4.199016 | 0.505879 | 348.89 | 0.4197 |
| C | 4.220159 | 4.574018 | 2.531293 | 348.18 | 0.05   |
| H | 4.990537 | 5.173819 | 2.458704 | 345.39 | 0.0174 |
| H | 4.530438 | 3.667099 | 2.734038 | 343.44 | 0.0102 |
| H | 3.629594 | 4.885412 | 3.248963 | 343.32 | 0.0057 |
| C | 0.516185 | 5.645094 | 1.656221 | 341.96 | 0.0093 |
| H | -0.32843 | 5.789893 | 1.160129 | 340.62 | 0.007  |
| H | 1.205846 | 6.229857 | 1.254605 | 340.23 | 0.0005 |
| C | 0.312571 | 6.051444 | 3.09623  | 338.94 | 0.0001 |
| H | 0.03571  | 6.990217 | 3.133898 | 337.68 | 0.0009 |
| H | 1.150694 | 5.935912 | 3.5905   | 332.57 | 0.0103 |

|   |          |          |          |        |        |
|---|----------|----------|----------|--------|--------|
| H | -0.38313 | 5.488954 | 3.498702 | 331.49 | 0.0319 |
| C | -4.3369  | 3.403284 | 2.493047 | 330.87 | 0.0196 |
| H | -5.2985  | 3.189374 | 2.393008 | 330.03 | 0.0095 |
| H | -4.07869 | 4.001727 | 1.7465   | 329.54 | 0.002  |
| C | -4.12315 | 4.135037 | 3.815839 | 329.39 | 0.0018 |
| H | -4.57901 | 5.002375 | 3.786471 | 328.72 | 0.0159 |
| H | -3.16291 | 4.275108 | 3.960198 | 327.69 | 0.0076 |
| H | -4.48731 | 3.598492 | 4.550963 | 326.47 | 0.017  |
| C | -5.37792 | 0.459418 | 2.998571 | 325.88 | 0.0157 |
| H | -5.83291 | 1.145625 | 3.544873 | 325.03 | 0.0556 |
| H | -5.36425 | -0.38382 | 3.519037 | 324.56 | 0.0751 |
| C | -6.16218 | 0.242393 | 1.711623 | 324.15 | 0.0078 |
| H | -7.06089 | -0.08493 | 1.925793 | 322.33 | 0.0429 |
| H | -5.69844 | -0.41814 | 1.154278 | 321.39 | 0.0256 |
| H | -6.23211 | 1.089958 | 1.224323 | 319.5  | 0.047  |
| C | -2.83498 | -4.15507 | 4.396631 | 318.97 | 0.1301 |
| H | -3.58053 | -3.52077 | 4.554801 | 318.75 | 0.0472 |
| H | -2.61162 | -4.58072 | 5.262369 | 318.3  | 0.0335 |
| C | -3.29866 | -5.23338 | 3.413622 | 317.41 | 0.0099 |
| H | -4.07397 | -5.70045 | 3.786311 | 316.51 | 0.1331 |
| H | -2.57181 | -5.8748  | 3.264168 | 314.98 | 0.0041 |
| H | -3.54362 | -4.81524 | 2.560693 | 314.77 | 0.052  |
| C | 0.232101 | -5.06832 | 4.436077 | 313.97 | 0.0145 |
| H | -0.43931 | -5.52354 | 5.004679 | 313.9  | 0.0097 |
| H | 1.023947 | -4.87625 | 4.998489 | 313.52 | 0.0787 |
| C | 0.645468 | -6.00534 | 3.311188 | 312.5  | 0.1337 |
| H | 1.016879 | -6.82917 | 3.690271 | 312.19 | 0.0077 |
| H | 1.321198 | -5.56939 | 2.753898 | 311.79 | 0.0594 |
| H | -0.13815 | -6.22456 | 2.766341 | 310.32 | 0.0326 |
| C | 4.827659 | -3.00534 | 2.891511 | 308.88 | 0.0336 |
| H | 4.517439 | -3.2728  | 3.792957 | 308.2  | 0.0314 |
| H | 5.774954 | -2.72606 | 2.968987 | 307.9  | 0.0948 |
| C | 4.739303 | -4.2193  | 1.95703  | 306.68 | 0.2127 |

|   |          |          |          |        |        |
|---|----------|----------|----------|--------|--------|
| H | 5.238556 | -4.96659 | 2.347212 | 306.05 | 0.0955 |
| H | 5.123627 | -3.98868 | 1.08678  | 305.02 | 0.0702 |
| H | 3.800731 | -4.47521 | 1.842696 | 303.23 | 0.018  |
| C | 5.81312  | -0.35943 | 1.425197 | 302.9  | 0.0016 |
| H | 5.834427 | 0.180672 | 0.596071 | 302.2  | 0.0238 |
| H | 6.327247 | -1.18876 | 1.260229 | 301.55 | 0.0183 |
| C | 6.467125 | 0.418324 | 2.540727 | 300.68 | 0.0052 |
| H | 7.377112 | 0.668566 | 2.278156 | 300.44 | 0.0198 |
| H | 6.50396  | -0.13395 | 3.351414 | 300.04 | 0.0177 |
| H | 5.946797 | 1.229152 | 2.722224 | 298.51 | 0.0725 |
| H | -1.7607  | 4.06643  | 1.690324 | 297.84 | 0.0124 |
| H | -2.23209 | 3.782937 | -1.27446 | 296.49 | 0.0322 |
|   |          |          |          | 295.03 | 0.0065 |
|   |          |          |          | 294.37 | 0.0123 |
|   |          |          |          | 293.99 | 0.0894 |
|   |          |          |          | 293.47 | 0.0263 |
|   |          |          |          | 292.21 | 0.2375 |
|   |          |          |          | 291.63 | 0.0046 |
|   |          |          |          | 290.73 | 0.0518 |
|   |          |          |          | 289.72 | 0.1201 |
|   |          |          |          | 282.13 | 0.0033 |
|   |          |          |          | 279.96 | 0.0312 |
|   |          |          |          | 279.49 | 0.0047 |
|   |          |          |          | 279.06 | 0.0074 |
|   |          |          |          | 278.73 | 0.0001 |
|   |          |          |          | 277.27 | 0.0015 |
|   |          |          |          | 276.66 | 0.0075 |
|   |          |          |          | 276.53 | 0.0044 |
|   |          |          |          | 274.36 | 0.0205 |
|   |          |          |          | 273.64 | 0.0128 |
|   |          |          |          | 272.6  | 0.0363 |
|   |          |          |          | 272.38 | 0.0542 |
|   |          |          |          | 271.88 | 0.0068 |

|           |                          |           |           |                           |                        |
|-----------|--------------------------|-----------|-----------|---------------------------|------------------------|
|           |                          |           |           | 271.23                    | 0.0238                 |
|           |                          |           |           | 270.94                    | 0.0118                 |
|           |                          |           |           | 270.49                    | 0.0173                 |
|           |                          |           |           | 270.01                    | 0.0023                 |
|           |                          |           |           | 269.11                    | 0.0034                 |
|           |                          |           |           | 268.93                    | 0.1182                 |
| <b>P3</b> | X-ray<br>xyz coordinates |           |           | Excites state<br>energies | Oscillator<br>strength |
| Fe        | 0.164138                 | 0.145877  | 1.840688  | 2388.74                   | 0.0001                 |
| O         | 0.074812                 | 0.752655  | -0.004759 | 2089.01                   | 0.0005                 |
| N         | 1.553854                 | 1.393016  | 2.515627  | 1735.26                   | 0.0001                 |
| N         | -1.251849                | 1.398533  | 2.54193   | 1621.54                   | 0.0032                 |
| N         | -1.237312                | -1.28499  | 1.835641  | 1556.43                   | 0.0276                 |
| N         | 1.566573                 | -1.302101 | 1.857279  | 1249.43                   | 0                      |
| C         | 2.894803                 | 1.318542  | 2.198794  | 1168.59                   | 0.0001                 |
| C         | 3.547443                 | 2.569856  | 2.555085  | 1158.31                   | 0                      |
| C         | 2.646907                 | 3.326044  | 3.168712  | 1126.63                   | 0.0006                 |
| C         | 1.385166                 | 2.634657  | 3.087925  | 1086.69                   | 0.0001                 |
| C         | 0.165176                 | 3.15936   | 3.448231  | 1067.77                   | 0.0036                 |
| H         | 0.175485                 | 3.977586  | 3.932389  | 946.29                    | 0.0002                 |
| C         | -1.073362                | 2.611209  | 3.17459   | 942.53                    | 0                      |
| C         | -2.346036                | 3.281719  | 3.291497  | 927.79                    | 0.0069                 |
| C         | -3.276438                | 2.522131  | 2.680397  | 850.54                    | 0.0005                 |
| C         | -2.604479                | 1.308249  | 2.235076  | 834.09                    | 0.0006                 |
| C         | -3.206091                | 0.183266  | 1.721688  | 829.07                    | 0.0005                 |
| C         | -2.591199                | -1.06417  | 1.694345  | 754.04                    | 0.0001                 |
| C         | -3.278612                | -2.34103  | 1.598025  | 740.22                    | 0.0002                 |
| C         | -2.329038                | -3.318176 | 1.672401  | 737.46                    | 0.0016                 |
| C         | -1.054697                | -2.651675 | 1.786605  | 730.88                    | 0.0001                 |
| C         | 0.173059                 | -3.295815 | 1.794631  | 720.62                    | 0.0004                 |
| H         | 0.16968                  | -4.244533 | 1.763115  | 704.7                     | 0.0048                 |
| C         | 1.411491                 | -2.66086  | 1.842061  | 694.89                    | 0.0008                 |
| C         | 2.676566                 | -3.312119 | 1.829792  | 644.82                    | 0.0005                 |

|   |           |           |          |        |        |
|---|-----------|-----------|----------|--------|--------|
| C | 3.609773  | -2.348091 | 1.762626 | 639.88 | 0.0039 |
| C | 2.924651  | -1.103772 | 1.760689 | 629.96 | 0.0034 |
| C | 3.499041  | 0.149886  | 1.730236 | 622.48 | 0.0752 |
| C | 4.962375  | 2.996816  | 1.972216 | 603.97 | 0.02   |
| H | 5.10837   | 2.643611  | 1.05975  | 589.32 | 0.0093 |
| H | 5.079706  | 3.980059  | 1.971154 | 574.37 | 0.0096 |
| C | 5.833223  | 2.345361  | 2.955523 | 570.47 | 0.0533 |
| H | 6.770539  | 2.519775  | 2.72964  | 562.09 | 0.0007 |
| H | 5.641344  | 2.700788  | 3.849096 | 548.05 | 0.0011 |
| H | 5.669683  | 1.378848  | 2.947598 | 542.79 | 0.0027 |
| C | 2.737976  | 4.80181   | 3.586301 | 537.47 | 0.0015 |
| H | 3.522361  | 5.24369   | 3.176046 | 532.24 | 0.0009 |
| H | 1.917438  | 5.296858  | 3.337594 | 529.08 | 0.0013 |
| C | 2.883401  | 4.702684  | 5.074117 | 521.28 | 0.0014 |
| H | 2.952275  | 5.602268  | 5.456531 | 519.14 | 0.0014 |
| H | 2.102096  | 4.246464  | 5.450211 | 498.65 | 0.0025 |
| H | 3.693498  | 4.193747  | 5.290031 | 490.09 | 0.0002 |
| C | -2.550492 | 4.602067  | 4.029193 | 487.42 | 0.0037 |
| H | -1.778075 | 5.194546  | 3.853013 | 478.64 | 0.0051 |
| H | -3.361309 | 5.047781  | 3.675406 | 477.7  | 0.0028 |
| C | -2.698731 | 4.422704  | 5.499854 | 474.74 | 0.01   |
| H | -2.828265 | 5.295696  | 5.924718 | 469.84 | 0.0002 |
| H | -3.475901 | 3.852444  | 5.682589 | 463.34 | 0.001  |
| H | -1.892261 | 3.999255  | 5.860239 | 460.94 | 0.0097 |
| C | -4.76266  | 2.792921  | 2.556108 | 456.24 | 0.0148 |
| H | -4.9232   | 3.767619  | 2.619429 | 453.91 | 0.0026 |
| H | -5.076647 | 2.489532  | 1.667038 | 450.16 | 0.0071 |
| C | -5.552714 | 2.086852  | 3.630883 | 447.1  | 0.006  |
| H | -6.50531  | 2.283337  | 3.520051 | 445.7  | 0.0059 |
| H | -5.408008 | 1.119169  | 3.560204 | 440.71 | 0.012  |
| H | -5.254649 | 2.396481  | 4.512042 | 436.23 | 0.0136 |
| C | -4.749773 | -2.541267 | 1.645808 | 433.85 | 0.0133 |
| H | -4.967373 | -3.429626 | 1.266412 | 430.62 | 0.0002 |



|   |           |           |           |        |        |
|---|-----------|-----------|-----------|--------|--------|
| H | -5.18693  | -1.856092 | 1.078952  | 429.08 | 0.0368 |
| C | -5.318234 | -2.451392 | 3.062129  | 426.77 | 0.0192 |
| H | -6.28661  | -2.58974  | 3.035101  | 421.64 | 0.0014 |
| H | -4.903744 | -3.140271 | 3.62294   | 418.02 | 0.0239 |
| H | -5.123364 | -1.566215 | 3.435416  | 416.41 | 0.0444 |
| C | -2.525859 | -4.797387 | 1.687683  | 411.82 | 0.0521 |
| H | -1.810614 | -5.224446 | 1.153368  | 406.16 | 0.0173 |
| H | -3.392695 | -5.012399 | 1.260585  | 405.49 | 0.0173 |
| C | -2.508624 | -5.381657 | 3.095599  | 401.87 | 0.032  |
| H | -2.641963 | -6.350588 | 3.049789  | 400.91 | 0.0119 |
| H | -1.645438 | -5.189408 | 3.518458  | 399.7  | 0.0015 |
| H | -3.228003 | -4.977311 | 3.625713  | 398.07 | 0.002  |
| C | 2.864781  | -4.786818 | 1.916847  | 394.61 | 0.0215 |
| H | 3.749011  | -5.020225 | 1.539742  | 392.86 | 0.1324 |
| H | 2.173818  | -5.231053 | 1.362828  | 391.42 | 0.0184 |
| C | 2.776039  | -5.324546 | 3.338364  | 391.33 | 0.0084 |
| H | 2.90704   | -6.295918 | 3.329989  | 388.58 | 0.0076 |
| H | 3.47049   | -4.906683 | 3.889987  | 386.61 | 0.0304 |
| H | 1.894059  | -5.117667 | 3.71294   | 382.16 | 0.0172 |
| C | 5.099247  | -2.553149 | 1.876409  | 381.33 | 0.0845 |
| H | 5.55805   | -1.864863 | 1.333739  | 380.72 | 0.1123 |
| H | 5.329234  | -3.438642 | 1.49786   | 379.37 | 0.0006 |
| C | 5.617665  | -2.479963 | 3.308319  | 377.79 | 0.0267 |
| H | 6.587934  | -2.620462 | 3.311263  | 376.61 | 0.0043 |
| H | 5.414713  | -1.598079 | 3.684475  | 375.89 | 0.0459 |
| H | 5.18567   | -3.173388 | 3.848763  | 373.67 | 0.0117 |
| N | -1.424657 | 1.340623  | -2.525841 | 370.68 | 0.086  |
| N | 1.379313  | 1.439398  | -2.552204 | 369.16 | 0.0486 |
| N | 1.453998  | -1.242321 | -1.842871 | 368.08 | 0.1748 |
| N | -1.347768 | -1.352678 | -1.864437 | 366.61 | 0.0025 |
| C | -2.762393 | 1.221963  | -2.208899 | 364.89 | 0.0711 |
| C | -3.456274 | 2.45048   | -2.566598 | 362.77 | 0.0074 |
| C | -2.581367 | 3.235495  | -3.181099 | 360.61 | 0.0194 |

|   |           |           |           |        |        |
|---|-----------|-----------|-----------|--------|--------|
| C | -1.297336 | 2.586537  | -3.099552 | 359.02 | 0.0618 |
| C | -0.09546  | 3.151105  | -3.460475 | 358.52 | 0.3947 |
| H | -0.13296  | 3.967986  | -3.945561 | 357.03 | 0.2362 |
| C | 1.160614  | 2.64475   | -3.186236 | 355.92 | 0.0396 |
| C | 2.410292  | 3.357073  | -3.303928 | 354.52 | 0.0055 |
| C | 3.365424  | 2.629535  | -2.691984 | 350.64 | 0.0526 |
| C | 2.73419   | 1.394488  | -2.245273 | 347.61 | 0.0314 |
| C | 3.372866  | 0.290714  | -1.730621 | 346.5  | 0.109  |
| C | 2.79979   | -0.976446 | -1.70185  | 345.62 | 0.0104 |
| C | 3.529278  | -2.229633 | -1.604095 | 342.55 | 0.0376 |
| C | 2.612722  | -3.237896 | -1.677345 | 342.13 | 0.0333 |
| C | 1.316926  | -2.614267 | -1.792281 | 340.74 | 0.2738 |
| C | 0.111267  | -3.298883 | -1.799552 | 339.89 | 0.3246 |
| H | 0.146188  | -4.246927 | -1.766959 | 338.32 | 0.0926 |
| C | -1.147592 | -2.705511 | -1.847679 | 336.4  | 0.1032 |
| C | -2.390313 | -3.398459 | -1.834647 | 335.33 | 0.1505 |
| C | -3.355059 | -2.465919 | -1.768558 | 335.14 | 0.0293 |
| C | -2.711691 | -1.199506 | -1.768045 | 334.4  | 0.0518 |
| C | -3.327448 | 0.034394  | -1.739004 | 332.85 | 0.0035 |
| C | -4.88463  | 2.830817  | -1.984187 | 330.59 | 0.0558 |
| H | -5.018817 | 2.473988  | -1.071318 | 329.74 | 0.127  |
| H | -5.034591 | 3.809616  | -1.984238 | 328.29 | 0.0209 |
| C | -5.733317 | 2.149651  | -2.966737 | 326.87 | 0.021  |
| H | -6.675917 | 2.293058  | -2.741034 | 325.41 | 0.0264 |
| H | -5.553346 | 2.510247  | -3.860716 | 322.97 | 0.0078 |
| H | -5.53773  | 1.18912   | -2.957719 | 322.28 | 0.0143 |
| C | -2.721447 | 4.706943  | -3.600361 | 321    | 0.0097 |
| H | -3.520099 | 5.122962  | -3.190592 | 319.24 | 0.0233 |
| H | -1.917829 | 5.229282  | -3.352231 | 318.63 | 0.0201 |
| C | -2.863469 | 4.601347  | -5.08806  | 316.76 | 0.0024 |
| H | -2.962208 | 5.49771   | -5.471493 | 316.46 | 0.1115 |
| H | -2.067418 | 4.170932  | -5.463651 | 315.22 | 0.0074 |
| H | -3.65619  | 4.065511  | -5.303382 | 312.91 | 0.0106 |

|   |           |           |           |        |        |
|---|-----------|-----------|-----------|--------|--------|
| C | 2.570747  | 4.682651  | -4.043125 | 311.01 | 0.0243 |
| H | 1.779053  | 5.249319  | -3.867603 | 310.47 | 0.016  |
| H | 3.366289  | 5.15548   | -3.68986  | 309.47 | 0.0081 |
| C | 2.724895  | 4.506648  | -5.513584 | 308.62 | 0.0216 |
| H | 2.825337  | 5.382981  | -5.939441 | 307.32 | 0.0064 |
| H | 3.520599  | 3.962337  | -5.695687 | 306.57 | 0.0302 |
| H | 1.932958  | 4.056209  | -5.873474 | 306.13 | 0.0146 |
| C | 4.841818  | 2.949733  | -2.56803  | 304.1  | 0.0192 |
| H | 4.969861  | 3.929158  | -2.63246  | 302.58 | 0.0011 |
| H | 5.165703  | 2.657962  | -1.678623 | 301.57 | 0.0073 |
| C | 5.654933  | 2.269106  | -3.642018 | 300.51 | 0.0449 |
| H | 6.600466  | 2.497282  | -3.531427 | 299.3  | 0.005  |
| H | 5.542481  | 1.297227  | -3.570238 | 298.72 | 0.0018 |
| H | 5.346754  | 2.567653  | -4.523522 | 298.22 | 0.0229 |
| C | 5.006284  | -2.380897 | -1.651679 | 296.86 | 0.002  |
| H | 5.253297  | -3.261099 | -1.271278 | 296.45 | 0.0359 |
| H | 5.420408  | -1.680922 | -1.085608 | 296.34 | 0.0116 |
| C | 5.571469  | -2.273777 | -3.068112 | 293.82 | 0.0267 |
| H | 6.54391   | -2.379819 | -3.040944 | 292.65 | 0.0112 |
| H | 5.180125  | -2.976693 | -3.628132 | 291.97 | 0.0109 |
| H | 5.347282  | -1.395994 | -3.442398 | 290.88 | 0.0099 |
| C | 2.858619  | -4.709762 | -1.690951 | 289.93 | 0.0125 |
| H | 2.157958  | -5.15976  | -1.156139 | 289.61 | 0.0202 |
| H | 3.732116  | -4.895347 | -1.263626 | 289.09 | 0.0246 |
| C | 2.860847  | -5.295878 | -3.098203 | 287.47 | 0.0127 |
| H | 3.026328  | -6.259787 | -3.051296 | 286.76 | 0.0108 |
| H | 1.991754  | -5.132917 | -3.521264 | 286.6  | 0.0059 |
| H | 3.566394  | -4.868439 | -3.628789 | 286.33 | 0.0077 |
| C | -2.529388 | -4.878699 | -1.920026 | 285.1  | 0.003  |
| H | -3.405375 | -5.14095  | -1.542639 | 284.93 | 0.0053 |
| H | -1.824047 | -5.299085 | -1.365516 | 282.63 | 0.0366 |
| C | -2.422788 | -5.414792 | -3.340934 | 282.27 | 0.026  |
| H | -2.521419 | -6.389973 | -3.331453 | 282.04 | 0.0478 |

|    |           |           |           |        |        |
|----|-----------|-----------|-----------|--------|--------|
| H  | -3.130739 | -5.020877 | -3.893017 | 281.4  | 0.0236 |
| H  | -1.548169 | -5.179126 | -3.715761 | 280.55 | 0.0244 |
| C  | -4.836891 | -2.720518 | -1.88208  | 279.86 | 0.0103 |
| H  | -5.318335 | -2.047253 | -1.340183 | 279.09 | 0.016  |
| H  | -5.037313 | -3.612739 | -1.502522 | 278.43 | 0.0072 |
| C  | -5.357427 | -2.666235 | -3.314062 | 278.19 | 0.0646 |
| H  | -6.322488 | -2.838921 | -3.316828 | 277.63 | 0.0005 |
| H  | -5.183903 | -1.778517 | -3.691223 | 277.23 | 0.0196 |
| H  | -4.902605 | -3.345525 | -3.853727 | 276.75 | 0.0418 |
| C  | -4.484189 | 0.189737  | -0.484718 | 276.54 | 0.0164 |
| H  | -5.36984  | 0.281152  | -0.814205 | 275.16 | 0.0329 |
| C  | -4.430184 | 0.214579  | 0.857648  | 274.18 | 0.007  |
| H  | -5.262753 | 0.255662  | 1.310578  | 273.88 | 0.0037 |
| Fe | 0.005747  | 0.141149  | -1.849514 | 273.25 | 0.01   |
| H  | 4.37126   | 0.335061  | -1.695367 | 272.82 | 0.0189 |
| H  | 4.498493  | 0.151087  | 1.697134  | 271.96 | 0.0112 |
|    |           |           |           | 270.88 | 0.0129 |
|    |           |           |           | 270.44 | 0.0896 |
|    |           |           |           | 269.9  | 0.0033 |
|    |           |           |           | 269.22 | 0.0107 |
|    |           |           |           | 268.92 | 0.0537 |
|    |           |           |           | 268.48 | 0.0107 |
|    |           |           |           | 267.56 | 0.0422 |
|    |           |           |           | 267.24 | 0.0128 |
|    |           |           |           | 267.01 | 0.0258 |
|    |           |           |           | 266.61 | 0.0487 |
|    |           |           |           | 266.36 | 0.0614 |
|    |           |           |           | 266.05 | 0.0076 |
|    |           |           |           | 265.6  | 0.0251 |
|    |           |           |           | 265.31 | 0.0337 |
|    |           |           |           | 264.48 | 0.0079 |
|    |           |           |           | 263.61 | 0.0335 |
|    |           |           |           | 263.22 | 0.034  |

|           |                                  |           |           |                           |                        |
|-----------|----------------------------------|-----------|-----------|---------------------------|------------------------|
|           |                                  |           |           | 263.02                    | 0.0025                 |
|           |                                  |           |           | 262.3                     | 0.0175                 |
|           |                                  |           |           | 262.16                    | 0.0169                 |
|           |                                  |           |           | 262.13                    | 0.0054                 |
|           |                                  |           |           | 261.5                     | 0.0008                 |
|           |                                  |           |           | 260.84                    | 0.011                  |
|           |                                  |           |           | 260.51                    | 0.0041                 |
|           |                                  |           |           | 260.38                    | 0.0025                 |
|           |                                  |           |           | 260.3                     | 0.0033                 |
|           |                                  |           |           | 259.38                    | 0.0084                 |
| <b>P4</b> | DFT Optimised<br>xyz coordinates |           |           | Excites state<br>energies | Oscillator<br>strength |
| Fe        | 0.091761                         | 0.817686  | 1.546323  | -1836.65                  | -0.0001                |
| O         | 0.132562                         | 0.595076  | -0.211497 | -2702.59                  | 0                      |
| N         | 0.84196                          | 2.735678  | 1.917049  | 3224.32                   | 0.0006                 |
| N         | -1.833211                        | 1.571134  | 1.885954  | 2157.71                   | 0.0001                 |
| N         | -0.699931                        | -1.016304 | 2.168491  | 1941.79                   | 0                      |
| N         | 1.98262                          | 0.123258  | 2.122991  | 1759.86                   | 0.0005                 |
| C         | 2.167484                         | 3.100954  | 1.884562  | 1650.15                   | 0.0011                 |
| C         | 2.29241                          | 4.565108  | 1.914073  | 1439.78                   | 0.0002                 |
| C         | 1.017807                         | 5.058823  | 1.985048  | 1332.1                    | 0.0001                 |
| C         | 0.12464                          | 3.893139  | 1.972423  | 1064.6                    | 0                      |
| C         | -1.275442                        | 3.96818   | 1.988034  | 1042.22                   | 0.0001                 |
| H         | -1.708184                        | 4.966807  | 2.01903   | 1030.39                   | 0.0001                 |
| C         | -2.166784                        | 2.903744  | 1.948794  | 885.17                    | 0.0001                 |
| C         | -3.62307                         | 3.058482  | 1.923431  | 835.55                    | 0.0146                 |
| C         | -4.150685                        | 1.800451  | 1.803488  | 828.3                     | 0.0061                 |
| C         | -2.999296                        | 0.869917  | 1.76804   | 814.99                    | 0.0003                 |
| C         | -3.073223                        | -0.550338 | 1.669936  | 788.11                    | 0.003                  |
| C         | -2.015611                        | -1.405267 | 2.033324  | 782.32                    | 0.0102                 |
| C         | -2.130604                        | -2.85099  | 2.327195  | 735.65                    | 0.0005                 |
| C         | -0.85989                         | -3.299425 | 2.566183  | 710.92                    | 0.0031                 |
| C         | 0.024678                         | -2.143276 | 2.432774  | 707.48                    | 0.0034                 |

|   |           |           |          |        |        |
|---|-----------|-----------|----------|--------|--------|
| C | 1.423698  | -2.225163 | 2.51234  | 693.18 | 0.0015 |
| H | 1.84192   | -3.212847 | 2.699303 | 675.94 | 0.0046 |
| C | 2.327278  | -1.18216  | 2.36129  | 669.33 | 0.002  |
| C | 3.790581  | -1.317773 | 2.419828 | 655.51 | 0.0076 |
| C | 4.302628  | -0.069605 | 2.189485 | 650.95 | 0.0045 |
| C | 3.149828  | 0.824617  | 2.029095 | 647.35 | 0.0037 |
| C | 3.238877  | 2.21547   | 1.873822 | 641.22 | 0.0091 |
| C | 3.590554  | 5.311973  | 1.959375 | 634.36 | 0.0117 |
| H | 4.303764  | 4.859167  | 1.249871 | 632.83 | 0.0039 |
| H | 3.427577  | 6.341848  | 1.606456 | 617.16 | 0.0028 |
| C | 4.213946  | 5.347044  | 3.36701  | 602.76 | 0.005  |
| H | 5.162919  | 5.903944  | 3.357886 | 593.35 | 0.0016 |
| H | 3.537265  | 5.836752  | 4.08377  | 588.7  | 0.0052 |
| H | 4.417204  | 4.331702  | 3.742807 | 573.67 | 0.0024 |
| C | 0.56837   | 6.481704  | 2.125031 | 570.25 | 0.0002 |
| H | 1.367922  | 7.150284  | 1.771154 | 568.58 | 0.0009 |
| H | -0.293265 | 6.665363  | 1.46071  | 563.59 | 0.0023 |
| C | 0.193537  | 6.852709  | 3.57137  | 545.49 | 0.0016 |
| H | -0.132192 | 7.901989  | 3.631684 | 543.77 | 0.0007 |
| H | -0.624145 | 6.219805  | 3.951542 | 531.43 | 0.0045 |
| H | 1.053916  | 6.722682  | 4.245531 | 525.01 | 0.0039 |
| C | -4.33845  | 4.364223  | 2.097299 | 511.98 | 0.0118 |
| H | -3.845224 | 5.13787   | 1.485087 | 507.12 | 0.01   |
| H | -5.361192 | 4.27853   | 1.700855 | 502.04 | 0.0101 |
| C | -4.394167 | 4.826892  | 3.564736 | 483.03 | 0.0007 |
| H | -4.92075  | 5.78935   | 3.648566 | 475.64 | 0.0034 |
| H | -4.924876 | 4.091894  | 4.188954 | 464.38 | 0.0069 |
| H | -3.3839   | 4.952387  | 3.985088 | 460.46 | 0.0231 |
| C | -5.611226 | 1.461099  | 1.901711 | 457.88 | 0.0047 |
| H | -6.195917 | 2.371885  | 1.705016 | 455.13 | 0.0222 |
| H | -5.903923 | 0.749623  | 1.11852  | 451.47 | 0.0182 |
| C | -5.999041 | 0.909194  | 3.284686 | 444.92 | 0.0523 |
| H | -7.070456 | 0.66032   | 3.32041  | 440.1  | 0.0142 |

|   |           |           |           |        |        |
|---|-----------|-----------|-----------|--------|--------|
| H | -5.428929 | 0.001279  | 3.537525  | 431.17 | 0.0188 |
| H | -5.794607 | 1.650091  | 4.072245  | 430.11 | 0.0071 |
| C | -3.394531 | -3.62902  | 2.54062   | 427.49 | 0.0704 |
| H | -3.153707 | -4.70255  | 2.550725  | 425.03 | 0.044  |
| H | -4.085508 | -3.483636 | 1.702841  | 421.68 | 0.0441 |
| C | -4.096899 | -3.252275 | 3.857022  | 415.85 | 0.0178 |
| H | -5.017271 | -3.840859 | 3.989535  | 411.59 | 0.0063 |
| H | -3.443073 | -3.440169 | 4.722142  | 411.43 | 0.0029 |
| H | -4.368824 | -2.185113 | 3.875672  | 406.14 | 0.0317 |
| C | -0.41207  | -4.673117 | 2.966518  | 405.17 | 0.0313 |
| H | 0.503645  | -4.934379 | 2.408571  | 401.97 | 0.0093 |
| H | -1.168643 | -5.407997 | 2.653023  | 401.03 | 0.0157 |
| C | -0.152103 | -4.810637 | 4.476364  | 397.24 | 0.0583 |
| H | 0.181314  | -5.829312 | 4.725587  | 395.16 | 0.0104 |
| H | 0.622351  | -4.104596 | 4.815431  | 394.18 | 0.0501 |
| H | -1.066729 | -4.600618 | 5.051569  | 391.69 | 0.1228 |
| C | 4.520438  | -2.577819 | 2.76697   | 391.45 | 0.0044 |
| H | 5.544661  | -2.527307 | 2.365468  | 390.21 | 0.0175 |
| H | 4.040934  | -3.433189 | 2.267073  | 388.4  | 0.0102 |
| C | 4.573339  | -2.837392 | 4.283566  | 387.59 | 0.0125 |
| H | 5.110415  | -3.773157 | 4.500133  | 385.19 | 0.1081 |
| H | 5.089719  | -2.018123 | 4.806092  | 384.32 | 0.0401 |
| H | 3.560786  | -2.917472 | 4.709663  | 382.83 | 0.0535 |
| C | 5.736551  | 0.367998  | 2.181798  | 379.78 | 0.0015 |
| H | 5.894538  | 1.095169  | 1.366887  | 379.28 | 0.008  |
| H | 6.375029  | -0.496214 | 1.941038  | 377.87 | 0.015  |
| C | 6.192209  | 0.983625  | 3.517041  | 375.6  | 0.0221 |
| H | 7.246588  | 1.293842  | 3.46379   | 373.28 | 0.0175 |
| H | 5.589765  | 1.867492  | 3.779533  | 372.66 | 0.0143 |
| H | 6.090558  | 0.258336  | 4.338465  | 370.84 | 0.0396 |
| N | -1.716653 | 0.148846  | -2.515465 | 370.47 | 0.0155 |
| N | 1.090192  | 0.781624  | -3.025431 | 369.32 | 0.0423 |
| N | 1.879942  | -1.538907 | -1.559411 | 368.4  | 0.0096 |

|   |           |           |           |        |        |
|---|-----------|-----------|-----------|--------|--------|
| N | -0.890882 | -2.212718 | -1.168577 | 367.05 | 0.02   |
| C | -2.949167 | -0.136385 | -1.921717 | 366.33 | 0.1071 |
| C | -3.92568  | 0.886216  | -2.323032 | 364.73 | 0.0158 |
| C | -3.267448 | 1.733667  | -3.180579 | 364.23 | 0.0215 |
| C | -1.883276 | 1.272254  | -3.242545 | 361.97 | 0.2461 |
| C | -0.849526 | 1.971905  | -3.921787 | 360.52 | 0.0065 |
| H | -1.163629 | 2.813829  | -4.538217 | 360.32 | 0.1522 |
| C | 0.50887   | 1.752436  | -3.821811 | 359.08 | 0.049  |
| C | 1.550938  | 2.570454  | -4.447335 | 357.88 | 0.04   |
| C | 2.749527  | 2.098186  | -3.970832 | 357.2  | 0.0941 |
| C | 2.427031  | 0.982039  | -3.082921 | 355.23 | 0.048  |
| C | 3.386033  | 0.20037   | -2.390929 | 354.39 | 0.1102 |
| C | 3.138513  | -0.980473 | -1.715245 | 351.83 | 0.0594 |
| C | 4.155512  | -1.90045  | -1.208622 | 350.7  | 0.1068 |
| C | 3.487405  | -3.04085  | -0.828444 | 349.78 | 0.0844 |
| C | 2.0692    | -2.776788 | -1.048352 | 348.01 | 0.0024 |
| C | 1.024779  | -3.700894 | -0.800145 | 344.82 | 0.042  |
| H | 1.322147  | -4.705687 | -0.500303 | 343.89 | 0.0654 |
| C | -0.32668  | -3.459356 | -0.914547 | 342.78 | 0.0064 |
| C | -1.383208 | -4.446609 | -0.733779 | 340.78 | 0.3329 |
| C | -2.575543 | -3.773311 | -0.85406  | 339.98 | 0.0258 |
| C | -2.225685 | -2.364892 | -1.074717 | 338.59 | 0.1301 |
| C | -3.170324 | -1.267936 | -1.149295 | 338.22 | 0.0218 |
| C | -5.390941 | 0.915259  | -2.00225  | 337.56 | 0.0378 |
| H | -5.548656 | 0.666261  | -0.944801 | 336.2  | 0.109  |
| H | -5.759942 | 1.944835  | -2.126211 | 335.88 | 0.0687 |
| C | -6.21961  | -0.025272 | -2.894503 | 334.26 | 0.1069 |
| H | -7.283301 | 0.003379  | -2.613391 | 332.5  | 0.0824 |
| H | -6.138854 | 0.266605  | -3.952386 | 330.74 | 0.0444 |
| H | -5.873521 | -1.068009 | -2.818033 | 329.29 | 0.0416 |
| C | -3.823289 | 2.88195   | -3.969771 | 327.86 | 0.0862 |
| H | -4.766126 | 3.217669  | -3.512283 | 327.55 | 0.1001 |
| H | -3.135999 | 3.742575  | -3.902915 | 327.12 | 0.0106 |



|   |           |           |           |        |        |
|---|-----------|-----------|-----------|--------|--------|
| C | -4.06917  | 2.533126  | -5.448572 | 324.59 | 0.0637 |
| H | -4.470207 | 3.401488  | -5.992537 | 322.98 | 0.0093 |
| H | -3.14022  | 2.217647  | -5.949846 | 321.95 | 0.0611 |
| H | -4.791174 | 1.707738  | -5.543298 | 320.86 | 0.0346 |
| C | 1.305194  | 3.654544  | -5.451987 | 319.78 | 0.0555 |
| H | 0.463248  | 4.285413  | -5.119654 | 318.84 | 0.0448 |
| H | 2.181597  | 4.319423  | -5.490584 | 317.82 | 0.0097 |
| C | 1.01312   | 3.107736  | -6.861196 | 314.97 | 0.0071 |
| H | 0.839749  | 3.931628  | -7.569701 | 314.75 | 0.0391 |
| H | 1.858516  | 2.509054  | -7.233656 | 314.19 | 0.0053 |
| H | 0.121192  | 2.461369  | -6.863131 | 313.44 | 0.0097 |
| C | 4.138328  | 2.539504  | -4.325602 | 312.96 | 0.0669 |
| H | 4.104704  | 3.572098  | -4.705463 | 311.81 | 0.0037 |
| H | 4.760553  | 2.576101  | -3.414772 | 310.3  | 0.0404 |
| C | 4.808128  | 1.631092  | -5.371839 | 308.8  | 0.0059 |
| H | 5.822661  | 1.986907  | -5.606612 | 308.24 | 0.017  |
| H | 4.885841  | 0.592304  | -5.012271 | 306.9  | 0.0089 |
| H | 4.226908  | 1.614484  | -6.306478 | 305.93 | 0.0039 |
| C | 5.631829  | -1.641459 | -1.213339 | 304.85 | 0.021  |
| H | 6.103857  | -2.252405 | -0.427516 | 303.74 | 0.0702 |
| H | 5.818799  | -0.591862 | -0.93046  | 303.06 | 0.0072 |
| C | 6.303946  | -1.94217  | -2.565063 | 302.33 | 0.0358 |
| H | 7.383602  | -1.734732 | -2.518536 | 301.49 | 0.0001 |
| H | 6.171503  | -2.998222 | -2.844462 | 301.02 | 0.0024 |
| H | 5.873258  | -1.329791 | -3.372729 | 300.37 | 0.0405 |
| C | 4.0578    | -4.353241 | -0.378112 | 299.91 | 0.0048 |
| H | 3.439913  | -4.769706 | 0.435758  | 298.99 | 0.0028 |
| H | 5.055603  | -4.187007 | 0.055736  | 298.53 | 0.0031 |
| C | 4.160304  | -5.38426  | -1.516406 | 298.16 | 0.008  |
| H | 4.577447  | -6.333609 | -1.147967 | 297.16 | 0.0414 |
| H | 3.173734  | -5.594181 | -1.959351 | 296.23 | 0.0228 |
| H | 4.811381  | -5.015054 | -2.323009 | 295.46 | 0.0314 |
| C | -1.155229 | -5.916367 | -0.548838 | 295.33 | 0.031  |

|    |           |           |           |        |        |
|----|-----------|-----------|-----------|--------|--------|
| H  | -2.029758 | -6.361324 | -0.049739 | 295.01 | 0.0016 |
| H  | -0.308739 | -6.072124 | 0.140654  | 294.55 | 0.0382 |
| C  | -0.884973 | -6.654041 | -1.871963 | 294.32 | 0.0294 |
| H  | -0.720346 | -7.727461 | -1.69428  | 292.78 | 0.0009 |
| H  | -1.736637 | -6.548573 | -2.561378 | 292.08 | 0.0276 |
| H  | 0.005394  | -6.249031 | -2.378212 | 290.85 | 0.0145 |
| C  | -3.944178 | -4.387128 | -0.944245 | 289.73 | 0.017  |
| H  | -4.631748 | -3.927294 | -0.220271 | 289.35 | 0.0272 |
| H  | -3.876693 | -5.4465   | -0.655267 | 289.18 | 0.0029 |
| C  | -4.544517 | -4.282988 | -2.356118 | 288.56 | 0.0076 |
| H  | -5.540122 | -4.750367 | -2.393131 | 288.18 | 0.0132 |
| H  | -4.650056 | -3.233071 | -2.673787 | 287.66 | 0.008  |
| H  | -3.902846 | -4.786246 | -3.095466 | 287.21 | 0.0172 |
| C  | -4.369417 | -1.407665 | -0.265155 | 286.74 | 0.0075 |
| H  | -5.308368 | -1.777034 | -0.688166 | 285.65 | 0.0212 |
| C  | -4.30728  | -1.134714 | 1.049252  | 284.92 | 0.0162 |
| H  | -5.197391 | -1.300762 | 1.661902  | 284.6  | 0.0013 |
| Fe | 0.106558  | -0.429183 | -1.649349 | 284.32 | 0.0079 |
| H  | 4.425717  | 0.515764  | -2.475785 | 283.2  | 0.0085 |
| H  | 4.238033  | 2.645169  | 1.820908  | 282.32 | 0.0836 |
|    |           |           |           | 282.15 | 0.01   |
|    |           |           |           | 281.29 | 0.0266 |
|    |           |           |           | 280.58 | 0.0134 |
|    |           |           |           | 279.31 | 0.0066 |
|    |           |           |           | 279.03 | 0.001  |
|    |           |           |           | 278.35 | 0.0043 |
|    |           |           |           | 277.89 | 0.0062 |
|    |           |           |           | 277.37 | 0.0242 |
|    |           |           |           | 277.2  | 0.1434 |
|    |           |           |           | 276.99 | 0.0304 |
|    |           |           |           | 276.01 | 0.0286 |
|    |           |           |           | 275.52 | 0.0021 |
|    |           |           |           | 275.04 | 0.0094 |

|  |  |  |  |        |        |
|--|--|--|--|--------|--------|
|  |  |  |  | 274.67 | 0.0162 |
|  |  |  |  | 274.57 | 0.0326 |
|  |  |  |  | 273.28 | 0.0257 |
|  |  |  |  | 272.68 | 0.0018 |
|  |  |  |  | 272.39 | 0.0345 |
|  |  |  |  | 270.89 | 0.0144 |
|  |  |  |  | 270.48 | 0.0172 |
|  |  |  |  | 269.32 | 0.0145 |
|  |  |  |  | 269.06 | 0.0493 |
|  |  |  |  | 268.13 | 0.0068 |
|  |  |  |  | 267.98 | 0.0116 |
|  |  |  |  | 267.35 | 0.0037 |
|  |  |  |  | 266.92 | 0.0238 |
|  |  |  |  | 266.45 | 0.0165 |

**Table S16.** The energies of spin ladders in P2, P3 and P4 are given in the Table.

| Spin states | <b>P2</b> (in kJmol <sup>-1</sup> ) | Spin states | <b>P3</b> (in kJmol <sup>-1</sup> ) | Spin states | <b>P4</b> (in kJmol <sup>-1</sup> ) |
|-------------|-------------------------------------|-------------|-------------------------------------|-------------|-------------------------------------|
| S = 0       | 0.000                               | S = 1/2     | 0.000                               | S = 0       | 0.000-8.736                         |
| S = 1       | 2.520                               | S = 3/2     | 0.9072                              | S = 1       | 8.736-17.040                        |
| S = 2       | 7.560                               | S = 5/2     | 2.7216                              | S = 2       | 17.040-19.560                       |
| S = 3       | 15.120                              | S = 7/2     | 5.4432                              | S = 3       | 19.560-25.800                       |
| S = 4       | 25.200                              | S = 9/2     | 9.072                               | S = 4       | 25.800-28.200                       |
| S = 5       | 42.600                              | S = 11/2    | 13.608                              | S = 5       | 28.200-28.800                       |
|             |                                     |             |                                     | S = 6       | 31.320                              |

The coordinates of DFT optimised geometries are given below:-

**P2**

```

Fe  -0.343485000  -0.472727000  -1.541545000
Fe   0.045831000   0.395731000   1.785402000
O   -0.370359000  -0.332837000   0.223185000
N    0.980976000   1.099288000  -2.004125000
N   -1.979287000   0.773909000  -2.058325000
N   -1.621833000  -2.065443000  -2.060804000
N    1.298543000  -1.717625000  -2.004510000
N    1.574011000   1.824087000   1.475317000
N   -1.308826000   2.001164000   2.053739000
N   -1.236659000  -0.676717000   3.051089000
N    1.621460000  -0.870388000   2.363788000
C    2.346357000   1.091019000  -1.891002000
C    2.854012000   2.459773000  -2.011837000
C    1.755715000   3.281442000  -2.122839000
C    0.595180000   2.421138000  -2.099432000
C   -0.722708000   2.811066000  -2.130394000
C   -1.927588000   2.148402000  -2.120365000
C   -3.265777000   2.703941000  -2.193020000
C   -4.128032000   1.629265000  -2.176219000
C   -3.301821000   0.433352000  -2.081673000

```

|   |              |              |              |
|---|--------------|--------------|--------------|
| C | -3.775979000 | -0.881703000 | -2.039406000 |
| H | -4.857817000 | -1.016572000 | -2.045083000 |
| C | -2.995168000 | -2.037752000 | -2.046877000 |
| C | -3.520947000 | -3.393216000 | -2.120915000 |
| C | -2.433558000 | -4.231705000 | -2.194808000 |
| C | -1.254350000 | -3.379472000 | -2.168630000 |
| C | 0.061218000  | -3.835690000 | -2.258933000 |
| H | 0.193801000  | -4.911652000 | -2.371569000 |
| C | 1.228938000  | -3.071589000 | -2.208714000 |
| C | 2.564213000  | -3.626301000 | -2.311563000 |
| C | 3.443529000  | -2.594219000 | -2.076914000 |
| C | 2.629930000  | -1.389063000 | -1.891424000 |
| C | 3.119205000  | -0.077811000 | -1.682538000 |
| C | 4.281710000  | 2.885743000  | -2.192928000 |
| H | 4.921031000  | 2.433225000  | -1.427323000 |
| H | 4.352684000  | 3.974660000  | -2.042612000 |
| C | 4.829590000  | 2.524650000  | -3.583311000 |
| H | 5.877101000  | 2.848989000  | -3.695441000 |
| H | 4.234662000  | 3.000755000  | -4.378652000 |
| H | 4.788751000  | 1.436566000  | -3.751962000 |
| C | 1.689307000  | 4.769665000  | -2.291345000 |
| H | 0.864813000  | 5.154896000  | -1.667182000 |
| H | 2.610870000  | 5.228338000  | -1.899355000 |
| C | 1.468629000  | 5.207902000  | -3.747648000 |
| H | 1.407555000  | 6.305331000  | -3.829485000 |
| H | 0.532950000  | 4.782618000  | -4.144214000 |
| H | 2.291479000  | 4.861162000  | -4.393056000 |
| C | -3.565313000 | 4.168127000  | -2.314860000 |
| H | -3.001497000 | 4.712403000  | -1.538787000 |
| H | -4.632245000 | 4.345819000  | -2.103644000 |
| C | -3.212975000 | 4.747351000  | -3.694443000 |
| H | -3.436457000 | 5.825478000  | -3.741971000 |
| H | -3.782262000 | 4.242354000  | -4.491174000 |
| H | -2.141806000 | 4.610919000  | -3.912434000 |

|   |              |              |              |
|---|--------------|--------------|--------------|
| C | -5.621113000 | 1.632313000  | -2.329619000 |
| H | -6.019147000 | 2.617445000  | -2.041016000 |
| H | -6.070358000 | 0.911574000  | -1.624949000 |
| C | -6.077101000 | 1.303105000  | -3.760983000 |
| H | -7.176484000 | 1.306163000  | -3.839958000 |
| H | -5.712642000 | 0.312387000  | -4.074816000 |
| H | -5.679235000 | 2.041000000  | -4.475639000 |
| C | -4.975122000 | -3.763981000 | -2.071833000 |
| H | -5.113184000 | -4.770424000 | -2.498550000 |
| H | -5.555410000 | -3.083940000 | -2.718815000 |
| C | -5.551511000 | -3.726334000 | -0.646949000 |
| H | -6.619720000 | -3.997662000 | -0.637936000 |
| H | -5.447978000 | -2.723371000 | -0.206410000 |
| H | -5.012804000 | -4.427150000 | 0.010634000  |
| C | -2.423136000 | -5.726818000 | -2.337302000 |
| H | -3.358777000 | -6.140043000 | -1.926919000 |
| H | -1.614132000 | -6.152416000 | -1.719448000 |
| C | -2.254153000 | -6.194222000 | -3.792608000 |
| H | -2.239876000 | -7.294242000 | -3.860377000 |
| H | -1.315440000 | -5.811529000 | -4.223423000 |
| H | -3.078727000 | -5.821595000 | -4.420828000 |
| C | 2.889398000  | -5.059584000 | -2.627490000 |
| H | 3.840871000  | -5.106052000 | -3.181642000 |
| H | 2.129656000  | -5.466527000 | -3.314789000 |
| C | 2.983516000  | -5.955282000 | -1.383341000 |
| H | 3.218464000  | -6.996977000 | -1.656238000 |
| H | 2.035181000  | -5.952434000 | -0.824310000 |
| H | 3.769607000  | -5.593833000 | -0.701596000 |
| C | 4.938427000  | -2.701101000 | -2.216409000 |
| H | 5.448212000  | -2.186395000 | -1.391739000 |
| H | 5.228217000  | -3.759563000 | -2.122584000 |
| C | 5.451123000  | -2.156904000 | -3.559683000 |
| H | 6.548201000  | -2.235605000 | -3.631510000 |
| H | 5.173365000  | -1.099712000 | -3.694559000 |

|   |              |              |              |
|---|--------------|--------------|--------------|
| H | 5.010279000  | -2.715687000 | -4.400231000 |
| C | 4.477357000  | 0.054559000  | -1.056074000 |
| H | 5.371895000  | 0.030983000  | -1.686908000 |
| C | 4.638006000  | 0.147067000  | 0.276857000  |
| H | 5.656074000  | 0.176520000  | 0.680077000  |
| C | 2.902155000  | 1.576949000  | 1.291616000  |
| C | 3.631652000  | 2.837110000  | 1.178407000  |
| C | 2.688429000  | 3.842346000  | 1.230146000  |
| C | 1.408879000  | 3.195990000  | 1.387120000  |
| C | 0.164325000  | 3.777385000  | 1.406831000  |
| C | -1.103099000 | 3.305434000  | 1.652107000  |
| C | -2.356981000 | 4.027586000  | 1.617438000  |
| C | -3.323008000 | 3.140511000  | 2.041897000  |
| C | -2.644261000 | 1.882017000  | 2.310339000  |
| C | -3.242376000 | 0.724553000  | 2.828236000  |
| H | -4.318700000 | 0.760427000  | 2.997950000  |
| C | -2.583874000 | -0.448078000 | 3.190767000  |
| C | -3.224585000 | -1.615401000 | 3.784278000  |
| C | -2.231973000 | -2.541663000 | 3.996498000  |
| C | -0.993503000 | -1.936233000 | 3.520132000  |
| C | 0.246494000  | -2.577616000 | 3.490172000  |
| H | 0.277318000  | -3.587561000 | 3.897506000  |
| C | 1.432384000  | -2.103849000 | 2.919949000  |
| C | 2.630751000  | -2.910415000 | 2.757287000  |
| C | 3.512906000  | -2.165709000 | 2.012008000  |
| C | 2.878404000  | -0.861808000 | 1.794475000  |
| C | 3.461343000  | 0.268823000  | 1.197577000  |
| C | 5.122185000  | 3.035508000  | 1.228872000  |
| H | 5.345793000  | 4.095675000  | 1.029486000  |
| H | 5.626821000  | 2.470746000  | 0.432583000  |
| C | 5.726756000  | 2.635988000  | 2.584547000  |
| H | 6.815987000  | 2.803862000  | 2.600001000  |
| H | 5.540269000  | 1.572269000  | 2.801829000  |
| H | 5.276799000  | 3.219231000  | 3.403385000  |

|   |              |              |             |
|---|--------------|--------------|-------------|
| C | 2.885489000  | 5.329346000  | 1.211260000 |
| H | 2.012653000  | 5.796060000  | 0.725679000 |
| H | 3.757538000  | 5.581532000  | 0.585103000 |
| C | 3.066873000  | 5.930153000  | 2.614374000 |
| H | 3.192400000  | 7.024186000  | 2.567676000 |
| H | 3.952180000  | 5.504955000  | 3.113620000 |
| H | 2.191888000  | 5.711236000  | 3.246604000 |
| C | -2.487755000 | 5.477254000  | 1.253669000 |
| H | -3.520432000 | 5.686949000  | 0.930860000 |
| H | -1.842463000 | 5.685627000  | 0.383065000 |
| C | -2.099380000 | 6.422739000  | 2.402082000 |
| H | -2.190037000 | 7.478314000  | 2.098158000 |
| H | -1.058621000 | 6.244149000  | 2.715809000 |
| H | -2.744206000 | 6.260596000  | 3.280461000 |
| C | -4.799776000 | 3.374599000  | 2.174667000 |
| H | -4.991736000 | 4.452627000  | 2.300273000 |
| H | -5.169945000 | 2.895639000  | 3.097183000 |
| C | -5.592697000 | 2.850679000  | 0.967949000 |
| H | -6.675632000 | 3.011271000  | 1.095346000 |
| H | -5.416115000 | 1.774553000  | 0.815452000 |
| H | -5.270558000 | 3.359823000  | 0.048743000 |
| C | -4.699270000 | -1.759474000 | 4.022768000 |
| H | -5.099285000 | -0.826735000 | 4.455919000 |
| H | -4.874897000 | -2.541838000 | 4.778869000 |
| C | -5.481277000 | -2.103585000 | 2.743827000 |
| H | -6.561858000 | -2.185393000 | 2.944608000 |
| H | -5.138078000 | -3.059277000 | 2.319606000 |
| H | -5.331856000 | -1.333283000 | 1.970922000 |
| C | -2.366988000 | -3.948196000 | 4.502216000 |
| H | -3.269308000 | -4.028349000 | 5.130213000 |
| H | -1.517804000 | -4.192930000 | 5.162846000 |
| C | -2.444580000 | -4.983716000 | 3.366234000 |
| H | -2.539599000 | -6.007196000 | 3.763926000 |
| H | -1.544593000 | -4.942536000 | 2.732616000 |



|           |              |              |              |
|-----------|--------------|--------------|--------------|
| H         | -3.310664000 | -4.785132000 | 2.715256000  |
| C         | 2.805805000  | -4.307540000 | 3.281321000  |
| H         | 2.373649000  | -4.375501000 | 4.294040000  |
| H         | 3.879312000  | -4.524067000 | 3.402631000  |
| C         | 2.170634000  | -5.377697000 | 2.379129000  |
| H         | 2.301986000  | -6.386791000 | 2.802501000  |
| H         | 2.626913000  | -5.361216000 | 1.379651000  |
| H         | 1.092174000  | -5.197659000 | 2.247167000  |
| C         | 4.907684000  | -2.580810000 | 1.640001000  |
| H         | 5.140438000  | -2.242008000 | 0.622935000  |
| H         | 4.955371000  | -3.681170000 | 1.605378000  |
| C         | 5.971027000  | -2.058967000 | 2.619602000  |
| H         | 6.985240000  | -2.354826000 | 2.305182000  |
| H         | 5.796323000  | -2.453492000 | 3.633095000  |
| H         | 5.941975000  | -0.960382000 | 2.691371000  |
| H         | 0.186602569  | 4.833233313  | 1.180804342  |
| H         | -0.838293598 | 3.884049492  | -2.172183906 |
| <b>P3</b> |              |              |              |
| Fe        | 0.147172822  | -0.521868941 | -1.591026007 |
| O         | 0.069815346  | -0.708414304 | 0.138221704  |
| N         | 1.525125049  | -1.880610739 | -2.035185088 |
| N         | -1.280619280 | -1.868442827 | -2.053686861 |
| N         | -1.243604511 | 0.897926674  | -1.838789541 |
| N         | 1.560232243  | 0.888606437  | -1.869525126 |
| C         | 2.867740611  | -1.761336924 | -1.739836217 |
| C         | 3.509778088  | -3.061342807 | -1.868060838 |
| C         | 2.601420309  | -3.907896317 | -2.334490654 |
| C         | 1.345143203  | -3.203201442 | -2.375792462 |
| C         | 0.119985976  | -3.774167596 | -2.633661948 |
| H         | 0.122456372  | -4.665842886 | -2.963689378 |
| C         | -1.113444356 | -3.176090539 | -2.459654068 |
| C         | -2.391473159 | -3.846561652 | -2.451851354 |
| C         | -3.313974852 | -2.982562714 | -1.984345756 |
| C         | -2.631410007 | -1.713990461 | -1.764848893 |

|   |              |              |              |
|---|--------------|--------------|--------------|
| C | -3.222782309 | -0.510586194 | -1.459581866 |
| C | -2.598564583 | 0.716702806  | -1.657193418 |
| C | -3.276136621 | 1.995626677  | -1.789236974 |
| C | -2.319624388 | 2.936140749  | -2.039345959 |
| C | -1.050685630 | 2.249853639  | -2.035401956 |
| C | 0.181773691  | 2.872395400  | -2.161304024 |
| H | 0.185542589  | 3.811451846  | -2.299973793 |
| C | 1.415283060  | 2.229371620  | -2.097223375 |
| C | 2.685187203  | 2.862250220  | -2.204516037 |
| C | 3.611462448  | 1.918388551  | -1.968135243 |
| C | 2.917147461  | 0.699960658  | -1.742113451 |
| C | 3.482336635  | -0.532566320 | -1.489233868 |
| C | 4.923631570  | -3.388415015 | -1.221449841 |
| H | 5.075581490  | -2.878895401 | -0.387205574 |
| H | 5.033674173  | -4.356518405 | -1.044811965 |
| C | 5.795677478  | -2.930253462 | -2.307399397 |
| H | 6.732495865  | -3.068904299 | -2.056098957 |
| H | 5.597897849  | -3.438215782 | -3.122553437 |
| H | 5.639336357  | -1.976635381 | -2.472097683 |
| C | 2.680017738  | -5.435227481 | -2.481600761 |
| H | 3.462603002  | -5.802836425 | -2.000715226 |
| H | 1.856749102  | -5.871280040 | -2.146492983 |
| C | 2.820723613  | -5.604931102 | -3.963482464 |
| H | 2.881526566  | -6.558920375 | -4.178988694 |
| H | 2.041449650  | -5.217129110 | -4.413329763 |
| H | 3.633774658  | -5.149266390 | -4.268786484 |
| C | -2.608410944 | -5.275882569 | -2.941030461 |
| H | -1.839766853 | -5.833423431 | -2.663481858 |
| H | -3.421208383 | -5.644683364 | -2.511383262 |
| C | -2.760701448 | -5.361243311 | -4.419715962 |
| H | -2.898258069 | -6.295084698 | -4.681291855 |
| H | -3.534287082 | -4.826697030 | -4.699728991 |
| H | -1.952440064 | -5.015493270 | -4.851862591 |
| C | -4.801698089 | -3.214939061 | -1.810243442 |

|   |              |              |              |
|---|--------------|--------------|--------------|
| H | -4.969689443 | -4.183940856 | -1.697845678 |
| H | -5.110169392 | -2.754958853 | -0.989060240 |
| C | -5.590427576 | -2.706202485 | -2.992171083 |
| H | -6.544041552 | -2.872121897 | -2.845814121 |
| H | -5.438294732 | -1.742660665 | -3.096038766 |
| H | -5.297895010 | -3.170780592 | -3.804418536 |
| C | -4.745938082 | 2.195776786  | -1.868712492 |
| H | -4.955556209 | 3.139364725  | -1.653829177 |
| H | -5.186082958 | 1.626517196  | -1.187454277 |
| C | -5.320232933 | 1.858584796  | -3.244822075 |
| H | -6.287451345 | 2.007228243  | -3.240768957 |
| H | -4.902704688 | 2.432749766  | -3.920743643 |
| H | -5.133298069 | 0.919400615  | -3.454212269 |
| C | -2.505529997 | 4.390289575  | -2.318500976 |
| H | -1.785187018 | 4.900319454  | -1.870814887 |
| H | -3.369178407 | 4.685097897  | -1.934773221 |
| C | -2.489120993 | 4.713201185  | -3.808250880 |
| H | -2.615105475 | 5.675733311  | -3.936176424 |
| H | -1.628938204 | 4.441575263  | -4.191871016 |
| H | -3.213414085 | 4.226301565  | -4.255856693 |
| C | 2.884008129  | 4.296064191  | -2.554356479 |
| H | 3.771319129  | 4.586112475  | -2.227093764 |
| H | 2.198390651  | 4.837692896  | -2.087153445 |
| C | 2.794048951  | 4.571595568  | -4.048922280 |
| H | 2.932276428  | 5.527733631  | -4.214717738 |
| H | 3.483358567  | 4.056313643  | -4.518492727 |
| H | 1.909193775  | 4.308081169  | -4.378446634 |
| C | 5.101988813  | 2.087947647  | -2.120151749 |
| H | 5.557661676  | 1.504180947  | -1.464173684 |
| H | 5.339918042  | 3.025006994  | -1.906608592 |
| C | 5.614602428  | 1.755748737  | -3.517059344 |
| H | 6.585868929  | 1.885740102  | -3.547295026 |
| H | 5.403742791  | 0.822453171  | -3.728955165 |
| H | 5.185782894  | 2.344756443  | -4.171827514 |

|   |              |              |             |
|---|--------------|--------------|-------------|
| N | -1.424657000 | -1.340623000 | 2.525841000 |
| N | 1.379313000  | -1.439398000 | 2.552204000 |
| N | 1.453998000  | 1.242321000  | 1.842871000 |
| N | -1.347768000 | 1.352678000  | 1.864437000 |
| C | -2.762393000 | -1.221963000 | 2.208899000 |
| C | -3.456274000 | -2.450480000 | 2.566598000 |
| C | -2.581367000 | -3.235495000 | 3.181099000 |
| C | -1.297336000 | -2.586537000 | 3.099552000 |
| C | -0.095460000 | -3.151105000 | 3.460475000 |
| H | -0.132960000 | -3.967986000 | 3.945561000 |
| C | 1.160614000  | -2.644750000 | 3.186236000 |
| C | 2.410292000  | -3.357073000 | 3.303928000 |
| C | 3.365424000  | -2.629535000 | 2.691984000 |
| C | 2.734190000  | -1.394488000 | 2.245273000 |
| C | 3.372866000  | -0.290714000 | 1.730621000 |
| C | 2.799790000  | 0.976446000  | 1.701850000 |
| C | 3.529278000  | 2.229633000  | 1.604095000 |
| C | 2.612722000  | 3.237896000  | 1.677345000 |
| C | 1.316926000  | 2.614267000  | 1.792281000 |
| C | 0.111267000  | 3.298883000  | 1.799552000 |
| H | 0.146188000  | 4.246927000  | 1.766959000 |
| C | -1.147592000 | 2.705511000  | 1.847679000 |
| C | -2.390313000 | 3.398459000  | 1.834647000 |
| C | -3.355059000 | 2.465919000  | 1.768558000 |
| C | -2.711691000 | 1.199506000  | 1.768045000 |
| C | -3.327448000 | -0.034394000 | 1.739004000 |
| C | -4.884630000 | -2.830817000 | 1.984187000 |
| H | -5.018817000 | -2.473988000 | 1.071318000 |
| H | -5.034591000 | -3.809616000 | 1.984238000 |
| C | -5.733317000 | -2.149651000 | 2.966737000 |
| H | -6.675917000 | -2.293058000 | 2.741034000 |
| H | -5.553346000 | -2.510247000 | 3.860716000 |
| H | -5.537730000 | -1.189120000 | 2.957719000 |
| C | -2.721447000 | -4.706943000 | 3.600361000 |

|   |              |              |             |
|---|--------------|--------------|-------------|
| H | -3.520099000 | -5.122962000 | 3.190592000 |
| H | -1.917829000 | -5.229282000 | 3.352231000 |
| C | -2.863469000 | -4.601347000 | 5.088060000 |
| H | -2.962208000 | -5.497710000 | 5.471493000 |
| H | -2.067418000 | -4.170932000 | 5.463651000 |
| H | -3.656190000 | -4.065511000 | 5.303382000 |
| C | 2.570747000  | -4.682651000 | 4.043125000 |
| H | 1.779053000  | -5.249319000 | 3.867603000 |
| H | 3.366289000  | -5.155480000 | 3.689860000 |
| C | 2.724895000  | -4.506648000 | 5.513584000 |
| H | 2.825337000  | -5.382981000 | 5.939441000 |
| H | 3.520599000  | -3.962337000 | 5.695687000 |
| H | 1.932958000  | -4.056209000 | 5.873474000 |
| C | 4.841818000  | -2.949733000 | 2.568030000 |
| H | 4.969861000  | -3.929158000 | 2.632460000 |
| H | 5.165703000  | -2.657962000 | 1.678623000 |
| C | 5.654933000  | -2.269106000 | 3.642018000 |
| H | 6.600466000  | -2.497282000 | 3.531427000 |
| H | 5.542481000  | -1.297227000 | 3.570238000 |
| H | 5.346754000  | -2.567653000 | 4.523522000 |
| C | 5.006284000  | 2.380897000  | 1.651679000 |
| H | 5.253297000  | 3.261099000  | 1.271278000 |
| H | 5.420408000  | 1.680922000  | 1.085608000 |
| C | 5.571469000  | 2.273777000  | 3.068112000 |
| H | 6.543910000  | 2.379819000  | 3.040944000 |
| H | 5.180125000  | 2.976693000  | 3.628132000 |
| H | 5.347282000  | 1.395994000  | 3.442398000 |
| C | 2.858619000  | 4.709762000  | 1.690951000 |
| H | 2.157958000  | 5.159760000  | 1.156139000 |
| H | 3.732116000  | 4.895347000  | 1.263626000 |
| C | 2.860847000  | 5.295878000  | 3.098203000 |
| H | 3.026328000  | 6.259787000  | 3.051296000 |
| H | 1.991754000  | 5.132917000  | 3.521264000 |
| H | 3.566394000  | 4.868439000  | 3.628789000 |

|           |              |              |              |
|-----------|--------------|--------------|--------------|
| C         | -2.529388000 | 4.878699000  | 1.920026000  |
| H         | -3.405375000 | 5.140950000  | 1.542639000  |
| H         | -1.824047000 | 5.299085000  | 1.365516000  |
| C         | -2.422788000 | 5.414792000  | 3.340934000  |
| H         | -2.521419000 | 6.389973000  | 3.331453000  |
| H         | -3.130739000 | 5.020877000  | 3.893017000  |
| H         | -1.548169000 | 5.179126000  | 3.715761000  |
| C         | -4.836891000 | 2.720518000  | 1.882080000  |
| H         | -5.318335000 | 2.047253000  | 1.340183000  |
| H         | -5.037313000 | 3.612739000  | 1.502522000  |
| C         | -5.357427000 | 2.666235000  | 3.314062000  |
| H         | -6.322488000 | 2.838921000  | 3.316828000  |
| H         | -5.183903000 | 1.778517000  | 3.691223000  |
| H         | -4.902605000 | 3.345525000  | 3.853727000  |
| C         | -4.484189000 | -0.189737000 | 0.484718000  |
| H         | -5.369840000 | -0.281152000 | 0.814205000  |
| C         | -4.430184000 | -0.214579000 | -0.857648000 |
| H         | -5.262753000 | -0.255662000 | -1.310578000 |
| Fe        | 0.005747000  | -0.141149000 | 1.849514000  |
| H         | 4.371260000  | -0.335061000 | 1.695367000  |
| H         | 4.481866804  | -0.535771772 | -1.458727268 |
| <b>P4</b> |              |              |              |
| Fe        | -0.069897000 | -0.274426000 | 1.829607000  |
| O         | 0.165082000  | 0.370284000  | 0.174909000  |
| N         | 1.076548000  | 1.126174000  | 2.726992000  |
| N         | -1.724026000 | 0.789048000  | 2.246190000  |
| N         | -1.274842000 | -1.871911000 | 1.594440000  |
| N         | 1.518778000  | -1.508762000 | 1.868642000  |
| C         | 2.444325000  | 1.192944000  | 2.649695000  |
| C         | 2.919277000  | 2.463114000  | 3.171182000  |
| C         | 1.804685000  | 3.159448000  | 3.573505000  |
| C         | 0.661415000  | 2.322123000  | 3.245758000  |
| C         | -0.663199000 | 2.740407000  | 3.306848000  |
| H         | -0.851678000 | 3.737316000  | 3.703105000  |

|   |              |              |             |
|---|--------------|--------------|-------------|
| C | -1.750923000 | 2.053187000  | 2.775958000 |
| C | -3.061666000 | 2.644784000  | 2.599938000 |
| C | -3.810046000 | 1.741645000  | 1.882725000 |
| C | -2.965316000 | 0.566089000  | 1.686970000 |
| C | -3.370990000 | -0.659866000 | 1.136462000 |
| C | -2.620286000 | -1.841556000 | 1.325640000 |
| C | -3.144534000 | -3.200259000 | 1.249444000 |
| C | -2.066146000 | -4.040799000 | 1.403696000 |
| C | -0.904200000 | -3.197344000 | 1.570616000 |
| C | 0.403728000  | -3.663323000 | 1.572975000 |
| H | 0.552816000  | -4.734975000 | 1.446104000 |
| C | 1.535777000  | -2.861716000 | 1.645500000 |
| C | 2.895826000  | -3.330714000 | 1.467700000 |
| C | 3.703093000  | -2.220510000 | 1.555532000 |
| C | 2.827611000  | -1.099581000 | 1.841564000 |
| C | 3.264352000  | 0.181121000  | 2.165259000 |
| C | 4.361985000  | 2.858762000  | 3.290004000 |
| H | 4.901724000  | 2.567437000  | 2.372568000 |
| H | 4.435513000  | 3.957036000  | 3.344097000 |
| C | 5.061694000  | 2.241956000  | 4.512850000 |
| H | 6.117992000  | 2.551740000  | 4.567168000 |
| H | 4.564426000  | 2.552592000  | 5.445444000 |
| H | 5.028630000  | 1.141589000  | 4.473329000 |
| C | 1.731149000  | 4.501025000  | 4.241321000 |
| H | 2.673636000  | 5.045852000  | 4.070788000 |
| H | 0.942428000  | 5.110773000  | 3.767583000 |
| C | 1.462378000  | 4.408297000  | 5.752631000 |
| H | 1.408701000  | 5.409137000  | 6.210991000 |
| H | 0.512268000  | 3.888087000  | 5.952991000 |
| H | 2.260619000  | 3.841569000  | 6.257912000 |
| C | -3.484665000 | 3.977306000  | 3.147147000 |
| H | -2.700088000 | 4.726678000  | 2.945903000 |
| H | -4.377481000 | 4.329116000  | 2.606731000 |
| C | -3.782732000 | 3.946973000  | 4.655615000 |

|   |              |              |             |
|---|--------------|--------------|-------------|
| H | -4.081894000 | 4.941999000  | 5.023051000 |
| H | -4.596738000 | 3.239828000  | 4.880501000 |
| H | -2.898867000 | 3.622303000  | 5.227147000 |
| C | -5.260930000 | 1.895445000  | 1.528117000 |
| H | -5.499463000 | 2.969194000  | 1.465179000 |
| H | -5.449415000 | 1.490263000  | 0.527132000 |
| C | -6.203583000 | 1.231966000  | 2.545192000 |
| H | -7.257977000 | 1.340637000  | 2.242959000 |
| H | -5.986951000 | 0.157219000  | 2.648945000 |
| H | -6.084762000 | 1.683553000  | 3.542633000 |
| C | -4.589113000 | -3.619537000 | 1.247470000 |
| H | -4.645235000 | -4.702886000 | 1.057362000 |
| H | -5.140786000 | -3.145564000 | 0.425713000 |
| C | -5.294970000 | -3.302152000 | 2.575671000 |
| H | -6.347342000 | -3.629199000 | 2.555859000 |
| H | -4.793941000 | -3.805337000 | 3.417724000 |
| H | -5.275745000 | -2.220714000 | 2.784094000 |
| C | -2.049016000 | -5.540642000 | 1.447079000 |
| H | -1.198658000 | -5.914258000 | 0.851515000 |
| H | -2.950073000 | -5.932492000 | 0.949067000 |
| C | -1.962273000 | -6.107539000 | 2.873104000 |
| H | -1.942266000 | -7.209482000 | 2.865819000 |
| H | -1.053282000 | -5.750342000 | 3.382480000 |
| H | -2.826089000 | -5.784143000 | 3.475495000 |
| C | 3.299033000  | -4.764212000 | 1.282460000 |
| H | 4.293949000  | -4.804554000 | 0.811561000 |
| H | 2.611087000  | -5.256204000 | 0.573662000 |
| C | 3.325282000  | -5.560374000 | 2.598026000 |
| H | 3.618400000  | -6.608636000 | 2.424926000 |
| H | 4.040130000  | -5.117184000 | 3.309087000 |
| H | 2.336023000  | -5.556343000 | 3.082362000 |
| C | 5.198064000  | -2.147004000 | 1.462011000 |
| H | 5.486432000  | -1.219820000 | 0.941339000 |
| H | 5.560054000  | -2.969067000 | 0.823201000 |



|   |              |              |              |
|---|--------------|--------------|--------------|
| C | 5.902319000  | -2.212303000 | 2.827164000  |
| H | 6.996960000  | -2.149125000 | 2.715253000  |
| H | 5.576675000  | -1.386360000 | 3.479316000  |
| H | 5.665105000  | -3.153807000 | 3.347180000  |
| N | -1.506432000 | 1.482884000  | -2.080443000 |
| N | 1.345169000  | 2.189639000  | -2.039462000 |
| N | 2.039313000  | -0.606877000 | -2.000994000 |
| N | -0.816246000 | -1.300243000 | -2.055153000 |
| C | -2.779227000 | 0.986266000  | -1.968494000 |
| C | -3.743050000 | 2.084517000  | -2.103057000 |
| C | -3.002323000 | 3.234544000  | -2.257917000 |
| C | -1.605595000 | 2.842281000  | -2.213984000 |
| C | -0.537963000 | 3.742619000  | -2.245262000 |
| H | -0.800101000 | 4.797749000  | -2.324874000 |
| C | 0.823940000  | 3.448568000  | -2.157110000 |
| C | 1.893362000  | 4.436717000  | -2.158652000 |
| C | 3.070075000  | 3.735075000  | -2.028791000 |
| C | 2.705378000  | 2.327185000  | -1.965928000 |
| C | 3.613814000  | 1.268607000  | -1.886630000 |
| C | 3.306227000  | -0.092377000 | -1.937801000 |
| C | 4.284435000  | -1.170560000 | -1.962127000 |
| C | 3.569078000  | -2.342961000 | -2.043298000 |
| C | 2.162089000  | -1.966433000 | -2.059682000 |
| C | 1.091191000  | -2.860604000 | -2.111475000 |
| H | 1.347380000  | -3.919939000 | -2.129268000 |
| C | -0.272212000 | -2.555612000 | -2.116687000 |
| C | -1.328911000 | -3.551533000 | -2.131211000 |
| C | -2.518461000 | -2.868089000 | -2.041233000 |
| C | -2.176322000 | -1.445834000 | -1.949553000 |
| C | -3.089389000 | -0.380960000 | -1.761678000 |
| C | -5.234832000 | 1.990768000  | -2.275707000 |
| H | -5.692821000 | 1.401450000  | -1.470308000 |
| H | -5.667594000 | 2.999687000  | -2.186320000 |
| C | -5.637593000 | 1.394692000  | -3.634803000 |

|   |              |              |              |
|---|--------------|--------------|--------------|
| H | -6.733548000 | 1.331678000  | -3.735139000 |
| H | -5.251735000 | 2.011622000  | -4.461554000 |
| H | -5.222349000 | 0.382986000  | -3.765782000 |
| C | -3.492869000 | 4.630391000  | -2.514324000 |
| H | -4.524020000 | 4.735380000  | -2.140848000 |
| H | -2.891545000 | 5.346013000  | -1.927982000 |
| C | -3.445749000 | 5.025558000  | -3.999665000 |
| H | -3.801455000 | 6.057769000  | -4.151182000 |
| H | -2.419151000 | 4.954575000  | -4.392551000 |
| H | -4.076113000 | 4.353524000  | -4.603424000 |
| C | 1.707108000  | 5.915491000  | -2.336556000 |
| H | 0.851531000  | 6.258896000  | -1.729806000 |
| H | 2.588253000  | 6.445907000  | -1.939883000 |
| C | 1.486123000  | 6.325444000  | -3.802528000 |
| H | 1.346919000  | 7.414799000  | -3.896853000 |
| H | 2.347729000  | 6.034364000  | -4.424086000 |
| H | 0.596710000  | 5.828402000  | -4.221136000 |
| C | 4.474375000  | 4.265594000  | -2.027875000 |
| H | 4.467883000  | 5.317687000  | -1.698791000 |
| H | 5.076342000  | 3.721220000  | -1.279825000 |
| C | 5.161242000  | 4.168622000  | -3.400786000 |
| H | 6.190745000  | 4.560579000  | -3.361991000 |
| H | 5.204615000  | 3.123931000  | -3.747336000 |
| H | 4.603906000  | 4.742536000  | -4.157970000 |
| C | 5.774067000  | -0.986999000 | -1.978532000 |
| H | 6.260314000  | -1.907521000 | -1.616784000 |
| H | 6.059819000  | -0.196845000 | -1.262718000 |
| C | 6.326950000  | -0.631180000 | -3.368862000 |
| H | 7.420830000  | -0.497957000 | -3.342666000 |
| H | 6.095099000  | -1.424699000 | -4.096584000 |
| H | 5.876375000  | 0.300935000  | -3.744799000 |
| C | 4.091223000  | -3.743514000 | -2.166518000 |
| H | 3.470296000  | -4.423851000 | -1.562101000 |
| H | 5.103272000  | -3.796977000 | -1.732035000 |

|    |              |              |              |
|----|--------------|--------------|--------------|
| C  | 4.131057000  | -4.250084000 | -3.617827000 |
| H  | 4.509770000  | -5.283942000 | -3.670904000 |
| H  | 3.125674000  | -4.229215000 | -4.067471000 |
| H  | 4.781736000  | -3.613961000 | -4.238358000 |
| C  | -1.115310000 | -5.030454000 | -2.270731000 |
| H  | -1.993750000 | -5.566394000 | -1.877304000 |
| H  | -0.271285000 | -5.337824000 | -1.629242000 |
| C  | -0.846299000 | -5.477564000 | -3.716541000 |
| H  | -0.683161000 | -6.566078000 | -3.776685000 |
| H  | -1.696479000 | -5.221778000 | -4.368644000 |
| H  | 0.044012000  | -4.973475000 | -4.124675000 |
| C  | -3.885245000 | -3.463140000 | -2.222557000 |
| H  | -4.577721000 | -3.088440000 | -1.460627000 |
| H  | -3.827728000 | -4.552334000 | -2.067857000 |
| C  | -4.470080000 | -3.177942000 | -3.615619000 |
| H  | -5.471747000 | -3.624559000 | -3.727208000 |
| H  | -4.557037000 | -2.093882000 | -3.791537000 |
| H  | -3.821389000 | -3.585337000 | -4.407141000 |
| C  | -4.412554000 | -0.679792000 | -1.119232000 |
| H  | -5.306746000 | -0.800630000 | -1.739933000 |
| C  | -4.550789000 | -0.752317000 | 0.217177000  |
| H  | -5.551837000 | -0.914965000 | 0.630432000  |
| Fe | 0.256311000  | 0.442121000  | -1.569737000 |
| H  | 4.669996000  | 1.531505000  | -1.824176000 |
| H  | 4.333806000  | 0.379064000  | 2.108676000  |
